# Supplementary material for: Vilsmeier reagent-mediated synthesis of 6-[(formyloxy)methyl]-pyrazolopyrimidines via a one-pot multiple tandem reaction
Source: Royal Society of Chemistry journal article supplement (doi:10.1039/c5ra07707a), 2015-01-01
Supplement: c5ra07707a1.pdf [file c5ra07707a1.pdf]

## SUPPORTING INFORMATION SECTION

### Vilsmeier reagent mediated synthesis of 6-[(formyloxy)methyl]-pyrazolopyrimidines via one-pot multiple tandem reaction

Shi-Han Lu,<sup>a,b</sup> Po-Lin Liu,<sup>b,c</sup> Fung Fuh Wong,<sup>\*a,b</sup>

<sup>a</sup>*School of Pharmacy, China Medical University, No. 91, Hsueh-Shih Rd., Taichung 40402, Taiwan*

<sup>b</sup>*Graduate Institute of Pharmaceutical Chemistry, China Medical University, No. 91, Hsueh-Shih Rd., Taichung 40402, Taiwan*

<sup>c</sup>*The contribution equal to first author.*

\*Corresponding Author. Tel.: +886 4 2205 3366 ext. 5603; Fax: +886 4 2207 8083.

E-mail address: wongfungfuh@yahoo.com.tw, ffwong@mail.cmu.edu.tw (F. F. Wong)

### Table of Contents

|                                                                                                                                                                                                                                     |     |
|-------------------------------------------------------------------------------------------------------------------------------------------------------------------------------------------------------------------------------------|-----|
| 1. General Procedures.....                                                                                                                                                                                                          | S2  |
| 2. Standard Procedure for Synthesis of 5-(2-haloacetyl amino)pyrazoles <b>1–16</b> and <b>33–35</b> .....                                                                                                                           | S3  |
| 3. Standard Procedure for Synthesis of 1,3-Diphenyl-6-[(formyloxy)methyl]-1 <i>H</i> -pyrazolo- [3,4- <i>d</i> ]pyrimidine <b>17</b> and (1,3-Diphenyl-1 <i>H</i> -pyrazolo[3,4- <i>d</i> ]-pyrimidin-6-yl)methanol <b>44</b> ..... | S7  |
| 4. Standard Procedure for Synthesis of 6-(Formylmethyl)pyrazolo[3,4- <i>d</i> ]pyrimidines <b>18–32</b> .....                                                                                                                       | S9  |
| 5. <sup>1</sup> H-NMR or <sup>13</sup> C-NMR of 5-(2-haloacetyl amino)pyrazoles <b>6</b> and <b>33–35</b> .....                                                                                                                     | S17 |
| 6. <sup>1</sup> H and <sup>13</sup> C-NMR Spectra of Reported Compounds <b>17</b> , <b>18–32</b> , and <b>44</b> .....                                                                                                              | S21 |
| 7. X-Ray data of 6-[(Formyloxy)methyl]-1-(3-methoxyphenyl)-3-phenyl-1 <i>H</i> -pyrazolo[3,4- <i>d</i> ]pyrimidine <b>24</b> .....                                                                                                  | S43 |
| 8. Notes and references.....                                                                                                                                                                                                        | S58 |

## General Procedures

All chemicals were reagent grade and used as purchased. All reactions were carried out under nitrogen atmosphere and monitored by TLC analysis. Dichloromethane, ethyl acetate and hexanes were purchased from Mallinckrodt Chemical Company. The following compounds were purchased from Acros Chemical Company: benzoylchlorid, chloroacetylchloride, formamide, oxalylchloride, phosphourtribromid and *p*-toluenesulfonyl chloride. Phosphorylchloride was purchased from Ferak Chemical Co. Thionyl chloride was purchased from Merck Reagents. Purification by gravity column chromatography was carried out by use of Merck Reagents Silica Gel 60 (particle size 0.063–0.200 mm, 70–230 mesh ASTM). Cesium formate and iodoacetylchloride were purchased from Sigma-Aldrich Chemical Company. Commercially available reagents were used without further purification unless otherwise noted. <sup>1</sup>H NMR were recorded at 200, 400, or 500 MHz and <sup>13</sup>C NMR recorded at 50, 100, or 125 MHz, respectively, in CDCl<sub>3</sub>, CH<sub>3</sub>OD, and DMSO-*d*<sub>6</sub> as solvent. The standard abbreviations s, d, t, q, and m refer to singlet, doublet, triplet, quartet, and multiplet, respectively. Coupling constant (*J*), whenever discernible, have been reported in Hz. Infrared spectra (IR) were recorded as neat solutions or solids; and mass spectra were recorded using electron impact or electrospray ionization techniques. The wavenumbers reported are referenced to the polystyrene 1601 cm<sup>-1</sup> absorption. High-resolution mass spectra were obtained by means of a JEOL JMS-HX110 mass spectrometer.

**Standard procedure for synthesis of 5-(2-haloacetylamino)pyrazoles 1–16 and 33–35.**<sup>1</sup> 1-Aryl-3-aryl-5-aminopyrazoles (1.0 equiv) was dissolved in CH<sub>2</sub>Cl<sub>2</sub> (10 mL) and stirred in ice-bath. 2-Chloroacetyl chloride, 2-chloroacetyl bromide, or 2-iodoacetyl chloride (1.2 equiv) in 10 mL of CH<sub>2</sub>Cl<sub>2</sub> or THF were slowly added to the reaction mixture at 0 °C under N<sub>2</sub>, respectively. The reaction was stirred at 0–10 °C for 3–4 h. The reaction mixture was washed with water (10 mL) and saturated aqueous NaHCO<sub>3</sub> (10 mL × 2). The organic layer was dried over MgSO<sub>4</sub>, filtered, and concentrated under reduced pressure. The residue was purified by column chromatography on silica gel to give the corresponding acylation product 5-(2-haloacetylamino)pyrazoles **1–6** and **33–35** in 73–87% yields.

**5-(2-Chloroacetylamino)-1-phenyl-3-phenylpyrazole (1).** <sup>1</sup>H NMR (CDCl<sub>3</sub>, 200 MHz) δ 4.18 (s, 2 H, CH<sub>2</sub>), 7.10 (s, 1 H), 7.23–7.55 (m, 8 H, ArH), 7.86 (dd, 2 H, *J* = 8.0, 4.0 Hz), 8.63 (br, 1 H, N–H).

**5-(2-Chloroacetylamino)-1-(2-methylphenyl)-3-phenylpyrazole (2).** <sup>1</sup>H NMR (CDCl<sub>3</sub>, 200 MHz) δ 2.38 (d, *J* = 7.6 Hz, 3 H, CH<sub>3</sub>), 4.10 (s, 2 H, CH<sub>2</sub>), 6.96 (s, 1 H), 7.38–7.44 (m, 9 H, ArH).

**5-(2-Chloroacetylamino)-1-(3-methylphenyl)-3-phenylpyrazole (3).** <sup>1</sup>H NMR (CDCl<sub>3</sub>, 200 MHz) δ 2.13 (s, 3 H, CH<sub>3</sub>), 4.04 (s, 2 H, CH<sub>2</sub>), 7.31–7.47 (m, 8 H, ArH), 7.91 (d, *J* = 3.0 Hz, 2 H, ArH), 8.82 (br, 1 H, N–H).

**5-(2-Chloroacetylamino)-1-(4-methylphenyl)-3-phenylpyrazole (4).** <sup>1</sup>H NMR (CDCl<sub>3</sub>, 200 MHz) δ 2.42 (s, 3 H, CH<sub>3</sub>), 4.18 (s, 2 H, CH<sub>2</sub>), 7.09 (s, 1 H), 7.25–7.43 (m, 7H, ArH), 7.86 (dd, 2 H, *J* = 9.6, 8.0 Hz), 8.61 (br, 1 H, N–H).

**5-(2-Chloroacetylamino)-1-(2-chlorophenyl)-3-phenylpyrazole (5).** <sup>1</sup>H NMR (CDCl<sub>3</sub>, 200 MHz) δ 4.13 (s, 2 H, CH<sub>2</sub>), 7.04 (s, 1 H), 7.25–7.55 (m, 9H, ArH), 8.29 (br, 1 H, N–H).

**5-(2-Chloroacetylamino)-1-(3-chlorophenyl)-3-phenylpyrazole (6).** Brown solid;

mp 101–102 °C; <sup>1</sup>H NMR (CDCl<sub>3</sub>, 200 MHz) δ 4.20 (s, 2 H, CH<sub>2</sub>), 7.08 (s, 1 H, ArH), 7.31–7.47 (m, 5 H, ArH), 7.61 (s, 2 H, ArH), 7.85 (d, *J* = 7.6 Hz, 2 H, ArH), 8.61 (s, 1 H, N–H); <sup>13</sup>C NMR (CDCl<sub>3</sub>, 50 MHz) δ 42.64, 96.23, 122.00, 124.88, 125.76 (2 × CH), 128.45, 128.66 (3 × CH), 130.84, 132.42, 135.42, 135.81, 138.64, 152.42, 162.50; IR (KBr) 3046, 2955, 2924, 2853, 1721 (s, C=O), 1201, 764; EIMS *m/z*: 349 (M<sup>+</sup> + 4, 2), 347 (M<sup>+</sup> + 2, 9), 345 (M<sup>+</sup>, 16), 194 (100), 165 (11), 133 (79), 105 (42), 91 (74), 77 (30); HRMS Calcd for C<sub>17</sub>H<sub>13</sub>Cl<sub>2</sub>ON<sub>3</sub>: 345.0436, Found: 345.0433.

**5-(2-Chloroacetylamino)-1-(4-chlorophenyl)-3-phenylpyrazole (7).** <sup>1</sup>H NMR (CDCl<sub>3</sub>, 200 MHz) δ 4.18 (s, 2 H, CH<sub>2</sub>), 7.04 (s, 1 H), 7.24–7.50 (m, 7H, ArH), 7.79 (dd, 2 H, *J* = 15.7, 7.8 Hz), 7.29 (br, 1 H, N–H).

**5-(2-Chloroacetylamino)-1-(3-methoxyphenyl)-3-phenylpyrazole (8).** <sup>1</sup>H NMR (CDCl<sub>3</sub>, 200 MHz) δ 3.86 (s, 3 H, CH<sub>3</sub>), 4.17 (s, 2 H, CH<sub>2</sub>), 7.01–7.07 (m, 3H, ArH), 7.39–7.46 (m, 5H, ArH), 7.83–7.84 (m, 2H, ArH), 8.54 (br, 1 H, N–H).

**5-(2-Chloroacetylamino)-1-phenyl-3-methylpyrazole (9).** <sup>1</sup>H NMR (CDCl<sub>3</sub>, 200 MHz) δ 2.30 (s, 3 H, CH<sub>3</sub>), 4.13 (s, 2 H, CH<sub>2</sub>), 6.55 (s, 1 H), 7.36–7.54 (m, 5H, ArH), 8.52 (br, 1 H, N–H).

**5-(2-Chloroacetylamino)-1-phenyl-3-tetrabutanyl pyrazole (10).** <sup>1</sup>H NMR (CDCl<sub>3</sub>, 200 MHz) δ 1.33 (s, 9 H, CH<sub>3</sub>), 4.13 (s, 2 H, CH<sub>2</sub>), 6.63 (s, 1 H), 7.46–7.48 (m, 5H, ArH), 8.58 (br, 1 H, N–H).

**5-(2-Chloroacetylamino)-1-phenyl-3-(4-methylphenyl) pyrazole (11).** <sup>1</sup>H NMR (CDCl<sub>3</sub>, 200 MHz) δ 2.36 (s, 3 H, CH<sub>3</sub>), 4.15 (s, 2 H, CH<sub>2</sub>), 6.74 (s, 1 H), 7.06–7.54 (m, 7H, ArH), 7.72 (d, *J* = 6.4 Hz, 2 H, ArH), 8.65 (br, 1 H, N–H).

**5-(2-Chloroacetylamino)-1-phenyl-3-(4-methoxyphenyl) pyrazole (12).** <sup>1</sup>H NMR (CDCl<sub>3</sub>, 200 MHz) δ 3.82 (s, 3 H, CH<sub>3</sub>), 4.18 (s, 2 H, CH<sub>2</sub>), 6.93 (d, *J* = 8.8 Hz, 2 H, ArH), 7.04 (s, 1 H), 7.43–7.55 (m, 5H, ArH), 7.80 (dd, 2 H, *J* = 8.8, 4.4 Hz), 8.62 (br, 1 H, N–H).

**5-(2-Chloroacetyl-amino)-1-(3-methylphenyl)-3-(4-methoxyphenyl) pyrazole (13).**

<sup>1</sup>H NMR (CDCl<sub>3</sub>, 200 MHz) δ 2.42 (s, 3 H, CH<sub>3</sub>), 3.82 (s, 3 H, CH<sub>3</sub>), 4.17 (s, 2 H, CH<sub>2</sub>), 6.92 (dd, 2 H, *J* = 8.8, 6.8 Hz), 7.03 (s, 1 H), 7.26–7.41 (m, 4H, ArH), 7.80 (dd, 2 H, *J* = 8.8, 6.8 Hz), 8.66 (br, 1 H, N–H).

**5-(2-Chloroacetyl-amino)-1-(4-methylphenyl)-3-(4-methoxyphenyl) pyrazole (14).**

<sup>1</sup>H NMR (CDCl<sub>3</sub>, 200 MHz) δ 2.39 (s, 3 H, CH<sub>3</sub>), 3.82 (s, 3 H, CH<sub>3</sub>), 4.17 (s, 2 H, CH<sub>2</sub>), 6.92 (dd, 2 H, *J* = 8.8, 4.4 Hz), 7.02 (s, 1 H), 7.30–7.42 (m, 4H, ArH), 7.78 (dd, 2 H, *J* = 8.8, 6.8 Hz), 8.60 (br, 1 H, N–H).

**5-(2-Chloroacetyl-amino)-1-(2-chlorophenyl)-3-tetrabutanyl pyrazole (15).**

<sup>1</sup>H NMR (CDCl<sub>3</sub>, 200 MHz) δ 1.35 (s, 9 H, CH<sub>3</sub>), 4.08 (s, 2 H, CH<sub>2</sub>), 6.56 (s, 1 H), 7.38–7.56 (m, 4H, ArH), 8.20 (br, 1 H, N–H); <sup>13</sup>C NMR (CDCl<sub>3</sub>, 50 MHz) δ 30.27 (3 × CH), 32.53, 42.49, 94.85, 128.24, 130.26, 130.58, 130.84, 131.61, 135.07, 135.55, 162.53, 163.29.

**5-(2-Chloroacetyl-amino)-1-(4-chlorophenyl)-3-tetrabutanyl pyrazole (16).**

<sup>1</sup>H NMR (CDCl<sub>3</sub>, 200 MHz) δ 1.29 (s, 9 H, CH<sub>3</sub>), 4.11 (s, 2 H, CH<sub>2</sub>), 6.56 (s, 1 H), 7.39–7.46 (m, 4H, ArH), 8.49 (br, 1 H, N–H).

**5-(2-Bromoacetyl-amino)-1-(3-chlorophenyl)-3-phenylpyrazole (33).**

Yellow solid; mp 106–107 °C; <sup>1</sup>H NMR (CDCl<sub>3</sub>, 400 MHz) δ 4.01 (s, 2 H, CH<sub>2</sub>), 7.05 (s, 1 H, ArH), 7.31–7.47 (m, 6 H, ArH), 7.61 (s, 1 H, ArH), 7.85 (d, *J* = 7.6 Hz, 2 H, ArH), 8.48 (s, 1 H, N–H); <sup>13</sup>C NMR (CDCl<sub>3</sub>, 100 MHz) δ 42.63, 96.23, 121.99, 124.87, 125.76 (2 × CH), 127.99, 128.66 (3 × CH), 130.84, 132.40, 135.42, 135.81, 138.61, 152.43, 162.50; IR (KBr) 3046, 2955, 2924, 2853, 1721 (s, C=O), 1201, 764; EIMS *m/z*: 393 (M<sup>+</sup> + 4, 25), 391 (M<sup>+</sup> + 2, 100), 389 (M<sup>+</sup>, 76), 296 (11), 271 (30), 269 (93), 233 (35), 102 (69), 77 (16); HRMS Calcd for C<sub>17</sub>H<sub>13</sub>BrClON<sub>3</sub>: 388.9931, Found: 388.9932.

**1-(3-Chlorophenyl)-5-(2-iodoacetyl-amino)-3-phenylpyrazole (34).**

Yellow solid; mp 103–104 °C; <sup>1</sup>H NMR (CDCl<sub>3</sub>, 200 MHz) δ 4.20 (s, 2 H, CH<sub>2</sub>), 7.08 (s, 1 H, ArH),

7.22 (m, 2 H, ArH), 7.42 (m, 4 H, ArH), 7.61 (s, 1 H, ArH), 7.85 (m, 2 H, ArH), 8.62 (s, 1 H, N-H);  $^{13}\text{C}$  NMR ( $\text{CDCl}_3$ , 50 MHz)  $\delta$  32.88, 90.21, 126.21, 127.26, 129.94 (2  $\times$  CH), 128.45, 132.54 (3  $\times$  CH), 134.52, 134.77, 135.69, 139.72, 1345.34, 152.43, 165.23; IR (KBr) 3229, 2920, 1674 (s, C=O), 1593, 1558, 1366, 1076, 763, 1201, 764; EIMS m/z: 439 ( $\text{M}^+ + 2$ , 13), 437 ( $\text{M}^+$ , 52), 345 (32), 269 (100), 233 (39), 102 (90), 91 (12), 77 (27); HRMS Calcd for  $\text{C}_{17}\text{H}_{13}\text{ClION}_3$ : 436.9792, Found: 436.9793.

**Standard procedure for synthesis of 1,3-diphenyl-6-[(formyloxy)methyl]-1H-pyrazolo-[3,4-*d*]pyrimidine 17 and (1,3-diphenyl-1H-pyrazolo[3,4-*d*]pyrimidin-6-yl)methanol 44.** The reliable procedure involved the treatment of 5-(2-chloroacetyl-amino)pyrazoles **1** (203 mg, 0.58 mmol, 1.0 equiv), with PBr<sub>3</sub> (1.77 mmol, ~ 0.2 mL, ~3.0 equiv) in formamide solution (2 mL) at 50–60 °C within 5 h. When the reaction was completed, the reaction mixture was added to saturate sodium bicarbonate (15 mL) and extracted with dichloromethane (15 mL × 2). The combined organic layer was washed sodium bicarbonate (15 mL), dried over MgSO<sub>4</sub>, filtered, and concentrated under reduced pressure. The residue solution was purified by column chromatography on silica gel to give the corresponding 6-(formylmethyl)pyrazolo[3,4-*d*]pyrimidines **17** (168 mg, 0.51 mmol) in 88 % yield and by-product (1,3-diphenyl- 1H-pyrazolo[3,4-*d*]pyrimidin-6-yl)methanol **44** (17.1 mg, 0.049 mmol) in 9% yield.

**1,3-Diphenyl-6-[(formyloxy)methyl]-1H-pyrazolo[3,4-*d*]pyrimidine (17).** Yellow solid; mp 126–127 °C; <sup>1</sup>H NMR (CDCl<sub>3</sub>, 200 MHz) δ 5.55 (s, 2 H, CH<sub>2</sub>), 7.33–7.37 (m, 1 H, ArH), 7.46–7.58 (m, 5 H, ArH), 8.01 (dd, *J* = 1.6, 7.9 Hz, 2 H, ArH), 8.28 (dd, *J* = 1.6, 7.9 Hz, 2 H, ArH), 8.33 (s, 1 H, CHO), 9.43 (s, 1 H, Pyrimidine-H); <sup>13</sup>C NMR (CDCl<sub>3</sub>, 50 MHz) δ 65.60, 113.14, 121.16 (2 × CH), 126.73, 127.26 (2 × CH), 129.14, 129.63 (4 × CH), 131.29, 138.39, 144.96, 152.97, 153.59, 160.50, 161.48; IR (KBr) 2955, 1721(s, C=O), 1585, 1497, 1416, 1200, 753; EIMS *m/z*: 330 (M<sup>+</sup>, 100), 301 (38), 286 (79), 273 (15), 271 (12), 180 (7), 142 (10), 91 (14), 77 (51); HRMS Calcd for C<sub>19</sub>H<sub>14</sub>O<sub>2</sub>N<sub>4</sub>: 330.1117, Found: 330.1121.

**(1,3-Diphenyl-1H-pyrazolo[3,4-*d*]pyrimidin-6-yl)methanol (44).** Yellow solid; mp 101–102 °C; <sup>1</sup>H NMR (CDCl<sub>3</sub>, 400 MHz) δ 4.99 (s, 2 H, CH<sub>2</sub>), 7.34–7.38 (m, 1 H, ArH), 7.48–7.57 (m, 5 H, ArH), 8.04 (d, *J* = 7.2 Hz, 2 H, ArH), 8.26 (d, *J* = 7.2 Hz, 2 H, ArH), 9.44 (s, 1 H, Pyrimidine-H); <sup>13</sup>C NMR (CDCl<sub>3</sub>, 100 MHz) δ 64.85, 113.21,

121.49 (2 × CH), 126.92, 127.36 (2 × CH), 129.22 (4 × CH), 129.70, 131.40, 138.39, 145.25, 152.82, 153.55, 166.22; IR (KBr) 3395 (OH, Br), 2916, 1651, 1543, 748; EIMS m/z: 302 (M<sup>+</sup>, 100), 301 (53), 273 (25), 273 (15), 271 (20), 91 (16), 77 (49); HRMS Calcd for C<sub>18</sub>H<sub>14</sub>ON<sub>4</sub>: 302.1168, Found: 302.1161.



**Standard Procedure for Synthesis of 6-(Formyloxymethyl)pyrazolo[3,4-*d*]pyrimidines 18–32.** The reliable procedure involved the treatment of 5-(2-chloroacetylamino)pyrazoles (**2–16**, 1.0 equiv), with PBr<sub>3</sub> (~3.0 equiv) in formamide solution (2 mL) at 50–60 °C within 5 h. When the reaction was completed, the reaction mixture was added to saturate sodium bicarbonate (15 mL) and extracted with dichloromethane (15 mL × 2). The combined organic layer was washed sodium bicarbonate (15 mL), dried over MgSO<sub>4</sub>, filtered, and concentrated under reduced pressure. The residue solution was purified by column chromatography on silica gel to give the corresponding 6-(formylmethyl)pyrazolo[3,4-*d*]pyrimidines **18–32** in 73–92 % yields.

**6-[(Formyloxy)methyl]-1-(2-methylphenyl)-3-phenyl-1*H*-pyrazolo[3,4-*d*]pyrimidine (18).** White solid; mp 133–134 °C; <sup>1</sup>H NMR (CDCl<sub>3</sub>, 400 MHz) δ 2.22 (s, 3 H, CH<sub>3</sub>), 5.47 (s, 2 H, CH<sub>2</sub>), 7.37–7.57 (m, 7 H, ArH), 8.03 (d, *J* = 7.6 Hz, 2 H, ArH), 8.23 (s, 1 H, CHO), 9.53 (s, 1 H, Pyrimidine–H); <sup>13</sup>C NMR (CDCl<sub>3</sub>, 100 MHz) δ 18.44, 65.69, 111.90, 126.69, 127.29 (2 × CH), 127.61, 129.24 (2 × CH), 129.41, 129.58, 131.43, 131.63, 135.40, 136.11, 145.16, 153.04, 154.55, 160.47, 161.72; IR (KBr) 2920, 2851, 1721 (s, C=O), 1589, 1458, 1265, 1184, 752; EIMS *m/z*: 344 (M<sup>+</sup>, 13), 299 (32), 298 (100), 256 (17), 202 (11), 189 (17), 155 (14), 133 (31), 91 (41), 88 (28), 77 (17); HRMS Calcd for C<sub>20</sub>H<sub>16</sub>O<sub>2</sub>N<sub>4</sub>: 344.1273, Found: 344.1274.

**6-[(Formyloxy)methyl]-1-(3-methylphenyl)-3-phenyl-1*H*-pyrazolo[3,4-*d*]pyrimidine (19).** White solid; mp 127–128 °C; <sup>1</sup>H NMR (CDCl<sub>3</sub>, 200 MHz) δ 2.22 (s, 3 H, CH<sub>3</sub>), 5.47 (s, 2 H, CH<sub>2</sub>), 7.34–7.59 (m, 5 H, ArH), 7.53 (d, *J* = 7.5 Hz, 2 H, ArH), 8.04 (dd, *J* = 1.4, 7.8 Hz, 2 H, ArH), 8.23 (s, 1 H, CHO), 9.49 (s, 1 H, Pyrimidine–H); <sup>13</sup>C NMR (CDCl<sub>3</sub>, 50 MHz) δ 18.43, 65.66, 111.88, 126.68, 127.27 (2 × CH), 127.60, 129.23 (2 × CH), 129.39, 129.57, 131.42, 131.60, 135.38, 136.08, 145.14, 153.03, 154.53, 160.46, 161.70; IR (KBr) 3059 (m), 2916, 2847, 1724 (s,

C=O), 1589, 1504, 1458, 1184, 1134, 760; EIMS  $m/z$ : 344 ( $M^+$ , 15), 298 (100), 256 (19), 163 (20), 146 (47), 134 (35), 120 (55), 115 (58), 99 (84), 77 (30); HRMS Calcd for  $C_{20}H_{16}O_2N_4$ : 344.1273, Found: 344.1268.

**6-[(Formyloxy)methyl]-1-(4-methylphenyl)-3-phenyl-1*H*-pyrazolo[3,4-**

***d*]pyrimidine (20).** White solid; mp 107–108 °C;  $^1H$  NMR ( $CDCl_3$ , 400 MHz)  $\delta$  2.42 (s, 3 H,  $CH_3$ ), 5.55 (s, 2 H,  $CH_2$ ), 7.34 (d,  $J = 8.0$  Hz, 2 H, ArH), 7.56 (s, 1 H, ArH), 8.04 (d,  $J = 8.0$  Hz, 2 H, ArH), 8.14 (d,  $J = 8.0$  Hz, 2 H, ArH), 8.23 (s, 1 H, CHO), 9.46 (s, 1 H, Pyrimidine-H);  $^{13}C$  NMR ( $CDCl_3$ , 50 MHz)  $\delta$  21.10, 65.68, 113.06, 121.35 (2  $\times$  CH), 127.34 (2  $\times$  CH), 129.22 (2  $\times$  CH), 129.71, 129.73 (2  $\times$  CH), 131.46, 135.97, 136.79, 144.87, 152.99, 153.45, 160.53, 161.42; IR (KBr) 2922, 1726 (s, C=O), 1514, 1454, 1184, 1172, 957, 816, 766; EIMS  $m/z$ : 344 ( $M^+$ , 100), 301 (37), 208 (11), 91 (19), 77 (10); HRMS Calcd for  $C_{20}H_{16}O_2N_4$ : 344.1273, Found: 344.1276.

**1-(2-Chlorophenyl)-6-[(formyloxy)methyl]-3-phenyl-1*H*-pyrazolo[3,4-**

***d*]pyrimidine (21).** Yellow solid; mp 81–82 °C;  $^1H$  NMR ( $CDCl_3$ , 200MHz)  $\delta$  5.47 (s, 2 H,  $CH_2$ ), 7.45–7.64 (m, 7 H, ArH), 8.02 (dd,  $J = 1.4, 7.7$  Hz, 2 H, ArH), 8.24 (s, 1 H, CHO), 9.48 (s, 1 H, Pyrimidine-H);  $^{13}C$  NMR ( $CDCl_3$ , 50 MHz)  $\delta$  65.61, 112.02, 127.37 (2  $\times$  CH), 127.59, 129.24 (2  $\times$  CH), 129.61, 129.72, 130.69, 130.78, 131.35, 132.09, 134.74, 145.79, 153.03, 154.99, 160.45, 161.92; IR (KBr) 3059, 2922, 2851, 1722 (s, C=O), 1591, 1503, 1410, 1184, 1132, 980, 756; EIMS  $m/z$ : 366 ( $M^+ + 2$ , 35), 364 ( $M^+$ , 100), 335 (34), 329 (13), 320 (83), 307 (15), 271 (13), 133 (29), 91 (24), 77 (27); HRMS Calcd for  $C_{19}H_{13}ClO_2N_4$ : 364.0721, Found: 364.0725.

**1-(3-Chlorophenyl)-6-[(formyloxy)methyl]-3-phenyl-1*H*-pyrazolo[3,4-**

***d*]pyrimidine (22).** Yellow solid; mp 128–129 °C;  $^1H$  NMR ( $CDCl_3$ , 400 MHz)  $\delta$  5.58 (s, 2 H,  $CH_2$ ), 7.32 (d,  $J = 7.2$  Hz, 1 H, ArH), 7.44–7.59 (m, 3 H, ArH), 7.57 (s, 1 H, ArH), 8.04 (d,  $J = 8.0$ , 2 H, ArH), 8.31 (d,  $J = 8.0$  Hz, 1 H, ArH), 8.34 (s, 1 H, ArH), 8.44 (s, 1 H, Pyrimidine-H), 9.46 (s, 1 H, CHO);  $^{13}C$  NMR ( $CDCl_3$ , 100 MHz)  $\delta$

65.46, 113.42, 118.81, 121.05, 126.58, 127.37 (2 × CH), 129.24 (2 × CH), 129.88, 130.15, 131.09, 134.90, 139.52, 145.51, 153.12, 153.97, 160.38, 161.88; IR (KBr) 3059,2922, 2851, 1722 (s, C=O), 1591, 1503, 1410, 1184, 1132, 980, 756; EIMS m/z: 366 (M<sup>+</sup> + 2, 34), 364 (M<sup>+</sup>, 100), 355 (16), 335 (53), 320 (77), 307 (22), 281 (18), 221 (18), 111 (12), 77 (18); HRMS Calcd for C<sub>19</sub>H<sub>13</sub>ClO<sub>2</sub>N<sub>4</sub>: 364.0721, Found: 364.0725.

**1-(4-Chlorophenyl)-6-[(formyloxy)methyl]-3-phenyl-1*H*-pyrazolo[3,4-*d*]pyrimidine (23).** Yellow solid; mp 127–128 °C; <sup>1</sup>H NMR (CDCl<sub>3</sub>, 200MHz) δ 5.56 (s, 2 H, CH<sub>2</sub>), 7.48–7.57 (m, 5 H, ArH), 8.03 (dd, *J* = 1.5, 8.4, 2 H, ArH), 8.31 (d, *J* = 8.4, 2 H, ArH), 8.33(s, 1 H, CHO ), 9.46 (s, 1 H, Pyrimidine–H); <sup>13</sup>C NMR (CDCl<sub>3</sub>, 100 MHz) δ 65.61, 113.36, 122.26, 125.75, 127.40, 129.32, 129.90 (2 × CH), 131.18, 132.21, 137.08, 145.41, 153.19, 153.78, 160.50, 161.81; IR (KBr) 3059,2922, 2851, 1722 (s, C=O), 1591, 1503, 1410, 1184, 1132, 980, 756; EIMS m/z: 366 (M<sup>+</sup> + 2, 2), 364 (M<sup>+</sup>, 7), 284 (21), 217 (11), 135 (100), 91 (16), 77 (9); HRMS Calcd for C<sub>19</sub>H<sub>13</sub>ClO<sub>2</sub>N<sub>4</sub>: 364.0721, Found: 364.0718.

**6-[(Formyloxy)methyl]-1-(3-methoxyphenyl)-3-phenyl-1*H*-pyrazolo-[3,4-*d*]pyrimidine (24).** Yellow solid; mp 90–91 °C; <sup>1</sup>H NMR (CDCl<sub>3</sub>, 400 MHz) δ 3.87 (s, 3 H, CH<sub>3</sub>), 5.54 (s, 2 H, CH<sub>2</sub>), 7.06 (d, *J* = 8.0 Hz, 2 H, ArH), 7.48–7.57 (m, 2 H, ArH), 7.55 (s, 1 H, ArH), 8.03 (d, *J* = 8.0 Hz, 2 H, ArH), 8.14 (dd, *J* = 2.0, 8.0 Hz, 2 H, ArH), 8.32 (s, 1 H, CHO), 9.45 (s, 1 H, Pyrimidine–H); <sup>13</sup>C NMR (CDCl<sub>3</sub>, 100 MHz) δ 55.58, 65.73, 112.91, 114.38 (2 × CH), 123.01 (2 × CH), 127.32 (2 × CH), 129.22 (2 × CH), 129.57, 131.55, 131.72, 144.71, 153.01, 153.29, 158.45, 160.51, 161.46; IR (KBr) 2924, 1728 (s, C=O), 1585, 1512, 1458, 1250, 1173, 1030, 829, 764; EIMS m/z: 360 (M<sup>+</sup>, 100), 331 (13), 316 (12), 77 (10); HRMS Calcd for C<sub>20</sub>H<sub>16</sub>O<sub>3</sub>N<sub>4</sub>: 360.1222, Found: 360.1224.

**6-[(Formyloxy)methyl]-3-methyl-1-phenyl-1*H*-pyrazolo[3,4-*d*]pyrimidine (25).** Brown solid; mp 85–86 °C; <sup>1</sup>H NMR (CDCl<sub>3</sub>, 400 MHz) δ 2.69 (s, 3 H, CH<sub>3</sub>), 5.52 (s,

2 H, CH<sub>2</sub>), 7.29–7.33 (m, 1 H, ArH), 7.48–7.52 (m, 1 H, ArH), 7.50 (s, 1 H, ArH), 8.19 (d, *J* = 8.0 Hz, 2 H, ArH), 8.30 (s, 1 H, CHO), 9.12 (s, 1 H, Pyrimidine–H); <sup>13</sup>C NMR (CDCl<sub>3</sub>, 100 MHz) δ 12.58, 65.74, 114.77, 120.87 (2 × CH), 126.41, 129.11 (2 × CH), 138.44, 143.41, 151.95, 153.12, 160.45, 161.58; IR (KBr) 2924, 2854, 1732 (s, C=O), 1589, 1508, 1458, 1161, 752; EIMS *m/z*: 268 (M<sup>+</sup>, 89), 239 (46), 224 (100), 211 (20), 142 (12), 91 (13), 77 (53); HRMS Calcd for C<sub>14</sub>H<sub>12</sub>O<sub>2</sub>N<sub>4</sub>: 268.0960, Found: 268.0963.

**3-tetra-Butanyl-6-[(formyloxy)methyl]-1-phenyl-1*H*-pyrazolo[3,4-*d*]pyrimidine**

**(26).** Brown solid; mp 91–92 °C; <sup>1</sup>H NMR (CDCl<sub>3</sub>, 200 MHz) δ 1.56 (s, 9 H, CH<sub>3</sub>), 5.51 (s, 2 H, CH<sub>2</sub>), 7.25–7.33 (m, 1 H, ArH), 7.46–7.53 (m, 2 H, ArH), 7.50 (s, 1 H, ArH), 8.22 (d, *J* = 8.0 Hz, 2 H, ArH), 8.30 (s, 1 H, CHO), 9.29 (s, 1 H, Pyrimidine–H); <sup>13</sup>C NMR (CDCl<sub>3</sub>, 50 MHz) δ 30.02 (3 × CH), 65.74, 113.02, 120.99 (2 × CH), 126.28, 129.08 (2 × CH), 138.62, 153.07, 153.53, 154.98, 160.54, 160.90; IR (KBr) 2963, 2924, 1732 (s, C=O), 1582, 1508, 1420, 1366, 1157, 756; EIMS *m/z*: 310 (M<sup>+</sup>, 21), 295 (30), 265 (12), 159 (15), 113 (12), 98 (13), 91 (100), 77 (20); HRMS Calcd for C<sub>17</sub>H<sub>18</sub>O<sub>2</sub>N<sub>4</sub>: 310.1434, Found: 310.1430.

**6-[(Formyloxy)methyl]-3-(4-methylphenyl)-1-phenyl-1*H*-pyrazolo[3,4-**

***d*]pyrimidine (27).** Yield: 87%; yellow liquid; <sup>1</sup>H NMR (CDCl<sub>3</sub>, 200 MHz) δ 2.44 (s, 3 H, CH<sub>3</sub>), 5.55 (s, 2 H, CH<sub>2</sub>), 7.36 (d, *J* = 8.1 Hz, 2 H, ArH), 7.53 (dd, *J* = 8.0, 7.4 Hz, 2 H, ArH), 7.94 (d, *J* = 8.1 Hz, 2 H, ArH), 8.30 (d, *J* = 8.1 Hz, 2 H, ArH), 8.32 (s, 1 H, CHO), 9.44 (s, 1 H, Pyrimidine–H); <sup>13</sup>C NMR (CDCl<sub>3</sub>, 50 MHz) δ 29.69, 65.70, 113.28, 121.27 (2 × CH), 126.72, 127.24 (2 × CH), 128.58, 129.16 (2 × CH), 129.93 (2 × CH), 138.53, 139.89, 145.19, 153.05, 153.68, 160.51, 160.51, 161.51; IR (KBr) 2920, 2851, 1717 (s, C=O), 1589, 1501, 1411, 1200, 1134, 980, 756 cm<sup>-1</sup>; EIMS *m/z*: 344 (M<sup>+</sup>, 100), 315 (36), 300 (51), 287 (11), 91 (13), 77 (17); HRMS Calcd for C<sub>20</sub>H<sub>16</sub>O<sub>2</sub>N<sub>4</sub>: 344.1273, Found: 344.1275.

**6-[(Formyloxy)methyl]-3-(4-methoxyphenyl)-1-phenyl-1*H*-pyrazolo-[3,4-*d*]pyrimidine (28).** Yellow solid; mp 165–167 °C; <sup>1</sup>H NMR (CDCl<sub>3</sub>, 200MHz) δ 3.88 (s, 3 H, CH<sub>3</sub>), 5.55 (s, 2 H, CH<sub>2</sub>), 7.07 (d, *J* = 8.8 Hz, 2 H, ArH), 7.33–7.37(m, 1 H, ArH), 7.49–7.57 (m, 2 H, ArH), 8.29 (dd, *J* = 1.0, 8.8 Hz, 2 H, ArH), 8.32 (s, 1 H, CHO), 9.41 (s, 1 H, Pyrimidine-H); <sup>13</sup>C NMR (CDCl<sub>3</sub>, 100 MHz) δ 55.42, 65.69, 113.19, 114.66 (2 × CH), 121.19 (2 × CH), 123.96, 126.24, 128.66 (2 × CH), 129.14 (2 × CH), 138.52, 144.92, 152.97, 153.61, 160.51, 160.83, 161.46; IR (KBr) 2922, 1715 (s, C=O), 1585, 1504, 1412, 1199, 1030, 982, 787 cm<sup>-1</sup>; EIMS *m/z*: 360 (M<sup>+</sup>, 100), 331 (24), 316 (29), 77 (15); HRMS Calcd for C<sub>20</sub>H<sub>16</sub>O<sub>3</sub>N<sub>4</sub>: 360.1222, Found: 360.1217.

**6-[(Formyloxy)methyl]-1-(3-methlyphenyl)-3-(4-methoxyphenyl)-1*H*-pyrazolo[3,4-*d*]pyrimidine (29).** Yellow solid; mp 138–139 °C; <sup>1</sup>H NMR (CDCl<sub>3</sub>, 400MHz) δ 2.47 (s, 3 H, CH<sub>3</sub>), 3.89 (s, 3 H, OCH<sub>3</sub>), 5.55 (s, 2 H, CH<sub>2</sub>), 7.08 (d, *J* = 8.4 Hz, 2 H, ArH), 7.17 (m, 1 H, ArH), 7.41 (m, 1 H, ArH), 7.99 (d, *J* = 8.4 Hz, 2 H, ArH), 8.08 (m, 2 H, ArH), 8.32 (s, 1 H, CHO), 9.42 (s, 1 H, Pyrimidine-H); <sup>13</sup>C NMR (CDCl<sub>3</sub>, 100 MHz) δ 21.62, 55.45, 65.73, 113.19, 114.72 (2 × CH), 118.50, 121.94, 124.10, 127.54, 128.72 (2 × CH), 128.97, 138.46, 139.19, 144.89, 152.97, 153.65, 160.49, 160.88, 161.46; IR (KBr) 2953, 1717 (s, C=O), 1585, 1503, 1408, 1175, 1134, 837, 787; EIMS *m/z*: 374 (M<sup>+</sup>, 100), 345 (19), 330 (24), 91 (8); HRMS Calcd for C<sub>21</sub>H<sub>18</sub>O<sub>3</sub>N<sub>4</sub>: 374.1379, Found: 374.1383.

**6-[(Formyloxy)methyl]-1-(4-methlyphenyl)-3-(4-methoxyphenyl)-1*H*-pyrazolo[3,4-*d*]pyrimidine (30).** Yellow solid; mp 152–154 °C; <sup>1</sup>H NMR (CDCl<sub>3</sub>, 200 MHz) δ 2.42 (s, 3 H, CH<sub>3</sub>), 3.89 (s, 3 H, OCH<sub>3</sub>), 5.54 (s, 2 H, CH<sub>2</sub>), 7.07 (d, *J* = 8.0 Hz, 2 H, ArH), 7.33 (d, *J* = 8.0 Hz, 2 H, ArH), 7.98 (d, *J* = 8.0 Hz, 2 H, ArH), 8.13 (d, *J* = 8.0 Hz, 2 H, ArH), 8.31 (s, 1 H, CHO), 9.41 (s, 1 H, Pyrimidine-H); <sup>13</sup>C NMR (CDCl<sub>3</sub>, 100 MHz) δ 21.62, 55.45, 65.73, 113.19, 114.72 (2 × CH), 118.50,

121.94, 124.10, 127.54, 128.72 (2 × CH), 128.97, 138.46, 139.19, 144.89, 152.97, 153.65, 160.49, 160.88, 161.46; IR (KBr) 2922, 1732 (s, C=O), 1585, 1504, 1412, 1199, 1136, 839, 754; EIMS m/z: 374 (M<sup>+</sup>, 100), 345 (19), 330 (25), 226 (22), 210 (13), 180 (15), 167 (36), 135 (18), 125 (20), 111 (40), 97 (51), 91 (17); HRMS Calcd for C<sub>21</sub>H<sub>18</sub>O<sub>3</sub>N<sub>4</sub>: 374.1379, Found: 374.1381.

**3-tetra-Butyl-1-(2-chlorophenyl)-6-[(formyloxy)methyl]-1H-pyrazolo[3,4-d]pyrimidine (31).** Yellow solid; mp 138–139 °C; <sup>1</sup>H NMR (CDCl<sub>3</sub>, 200 MHz) δ 1.56 (s, 9 H, CH<sub>3</sub>), 5.51 (s, 2 H, CH<sub>2</sub>), 7.25–7.33 (m, 1 H, ArH), 7.46–7.53 (m, 2 H, ArH), 8.22 (d, *J* = 8.0 Hz, 2 H, ArH), 8.23 (s, 1 H, CHO), 9.46 (s, 1 H, Pyrimidine-H); <sup>13</sup>C NMR (CDCl<sub>3</sub>, 50 MHz) δ 30.01 (3 × CH), 67.54, 112.03, 121.97 (2 × CH), 128.72, 129.08 (2 × CH), 139.63, 153.07, 153.53, 154.98, 156.35, 161.93; IR (KBr) 2916, 1721 (s, C=O), 1578, 1558, 1458, 1261, 1165, 760, 694; EIMS m/z: 346 (M<sup>+</sup> + 2, 30), 344 (M<sup>+</sup>, 100), 345 (19), 330 (25), 226 (22), 210 (13), 180 (15), 167 (36), 135 (18), 125 (20), 111 (40), 97 (51), 91 (17); HRMS Calcd for C<sub>17</sub>H<sub>17</sub>ClO<sub>4</sub>N<sub>2</sub>: 344.1040, Found: 344.1044.

**3-Tetrabutanyl-1-(4-chlorophenyl)-6-[(formyloxy)methyl]-1H-pyrazolo[3,4-d]pyrimidine (32).** Yellow solid; mp 147–148 °C; <sup>1</sup>H NMR (CDCl<sub>3</sub>, 200 MHz) δ 1.55 (s, 9 H, CH<sub>3</sub>), 5.51 (s, 2 H, CH<sub>2</sub>), 7.49 (m, 2 H, ArH), 8.25 (m, 2H, ArH), 8.30 (s, 1 H, CHO), 9.29 (s, 1 H, Pyrimidine-H); <sup>13</sup>C NMR (CDCl<sub>3</sub>, 50 MHz) δ 30.27 (3 × CH), 65.70, 128.24 (2 × CH), 130.26, 130.58, 130.84 (2 × CH), 131.61, 135.07, 135.55, 145.19, 153.05, 162.53, 163.29; IR (KBr) 2922, 1721 (s, C=O), 1585, 1252, 1175, 1026, 781; EIMS m/z: 346 (M<sup>+</sup> + 2, 37), 344 (M<sup>+</sup>, 94), 345 (19), 330 (25), 226 (22), 210 (13), 180 (15), 167 (36), 135 (18), 125 (20), 111 (40), 97 (51), 91 (17); HRMS Calcd for C<sub>17</sub>H<sub>17</sub>ClO<sub>4</sub>N<sub>2</sub>: 344.1040, Found: 344.1043. (100), 55 (44); HRMS calcd. for C<sub>17</sub>H<sub>22</sub>N<sub>4</sub>O<sub>3</sub>, 330.1692; found 330.1696.

**1-(3-Chlorophenyl)-3phenyl-5-(2-hydroxyacetylamino)pyrazole (35)**<sup>29</sup> A solution

of 5-(2-chloroacetylamino)pyrazole (**6**, 1.0 equiv) and cesium formate (HCO<sub>2</sub>Cs, 3.0 equiv) in dry MeOH (10 mL) was heated at reflux for >2.0 h. When the reaction was completed, the solution was filtered to remove the excess amount of HCO<sub>2</sub>Cs and the filtrate was concentrated under reduced pressure. The residue was purified by column chromatography on silica gel or re-crystallization to give the corresponding 5-(2-hydroxyacetylamino)pyrazole **35** in 84% yield. yellow solid; mp 98–99 °C; <sup>1</sup>H NMR (CDCl<sub>3</sub>, 200 MHz) δ 4.15 (s, 2 H, CH<sub>2</sub>), 7.06 (s, 1 H, ArH), 7.32–7.44 (m, 7 H, ArH), 7.56 (m, 1 H, ArH), 7.83 (dd, *J* = 4.5, 8.2 Hz, 2 H, ArH), 8.79 (s, 1 H, NH); <sup>13</sup>C NMR (CDCl<sub>3</sub>, 50 MHz) δ 62.12, 95.94, 122.08, 124.87, 125.78 (2 × CH), 128.46, 128.54, 128.66 (2 × CH), 130.74, 132.44, 135.61, 136.03, 138.75, 152.51, 168.37; IR (KBr) 3429, 2359, 1591, 1184, 966, 756; EIMS *m/z*: 329 (M<sup>+</sup> + 2, 33), 327 (M<sup>+</sup>, 73), 329 (33), 270 (32), 235 (20), 220 (39), 207 (25), 195 (58), 180 (97), 162 (24), 135 (94), 121 (100), 102 (36), 91 (56), 81 (77); HRMS Calcd for C<sub>17</sub>H<sub>14</sub>ClO<sub>2</sub>N<sub>3</sub>: 327.0775, Found: 327.0776.

**6-(Chloromethyl)pyrazolo[3,4-*d*]pyrimidine (40).** The treatment of 1,3-diphenyl-1*H*-pyrazolo[3,4-*d*]pyrimidin-6-yl)methanol (**44**, 1.0 equiv), with SOCl<sub>2</sub> (~3.0 equiv) in formamide solution (2 mL) at 50–60 °C within 3 h. When the reaction was completed, the reaction mixture was added to saturate sodium bicarbonate (15 mL) and extracted with dichloromethane (15 mL × 2). The combined organic layer was washed sodium bicarbonate (15 mL), dried over MgSO<sub>4</sub>, filtered, and concentrated under reduced pressure. The residue solution was purified by column chromatography on silica gel to give the corresponding 6-(chloromethyl)pyrazolo[3,4-*d*]pyrimidine **40** in 80 % yields: yellow solid; mp 133–134 °C; <sup>1</sup>H NMR (CDCl<sub>3</sub>, 200 MHz) δ 4.89 (s, 2 H, CH<sub>2</sub>), 7.32–7.40 (m, 1 H, ArH), 7.49–7.61 (m, 5 H, ArH), 8.05 (dd, *J* = 7.2, Hz, 2 H, ArH), 8.26 (dd, *J* = 7.2 Hz, 2 H, ArH), 9.49 (s, 1 H, Pyrimidine-H); <sup>13</sup>C NMR (CDCl<sub>3</sub>, 50 MHz) δ 47.33, 112.95, 121.33 (2 × CH), 126.87, 127.37 (2 × CH), 129.24

(3 × CH), 129.73, 131.38, 138.50, 145.07, 153.37, 153.88, 162.99; IR (KBr) 2920, 1581, 1501, 1226, 1134, 976, 756, 691; EIMS m/z: 320 (M<sup>+</sup>, 100), 319 (38), 294 (35), 251 (24), 221 (20), 207 (48), 140 (15), 91 (39), 77 (56); HRMS Calcd for C<sub>18</sub>H<sub>13</sub>ClN<sub>4</sub>: 320.0829; Found: 320.0828.



# <sup>1</sup>H-NMR and <sup>13</sup>C-NMR of 5-(2-haloacetyl)pyrazoles 6 and 33–35

## 5-(2-Chloroacetyl)amino)-1-(3-chlorophenyl)-3-phenylpyrazole 6

### <sup>1</sup>H-NMR

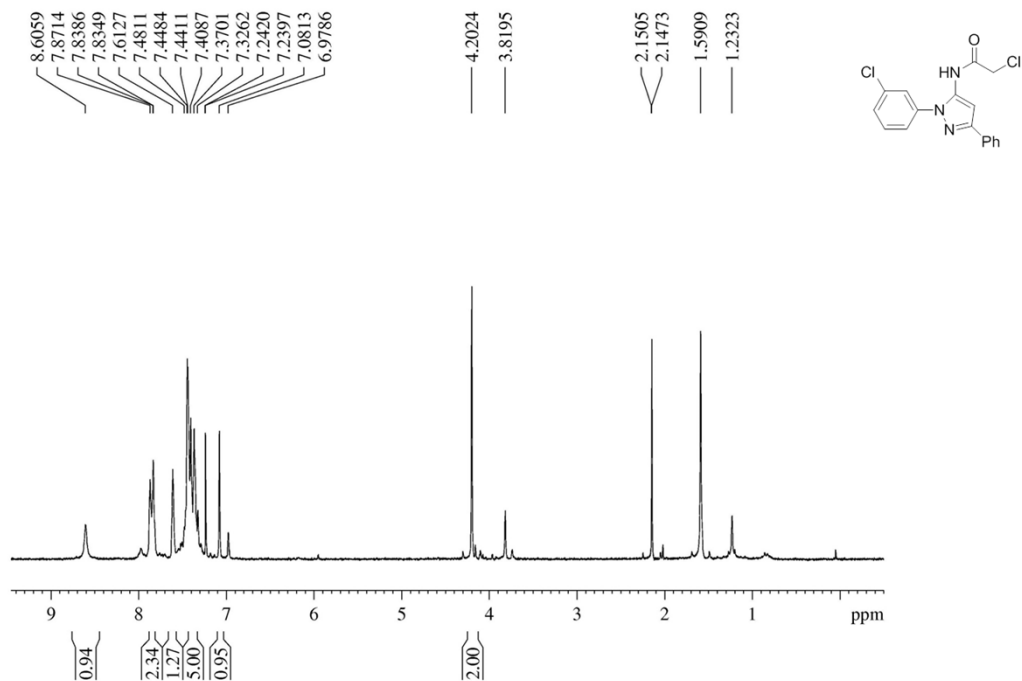

### <sup>13</sup>C-NMR

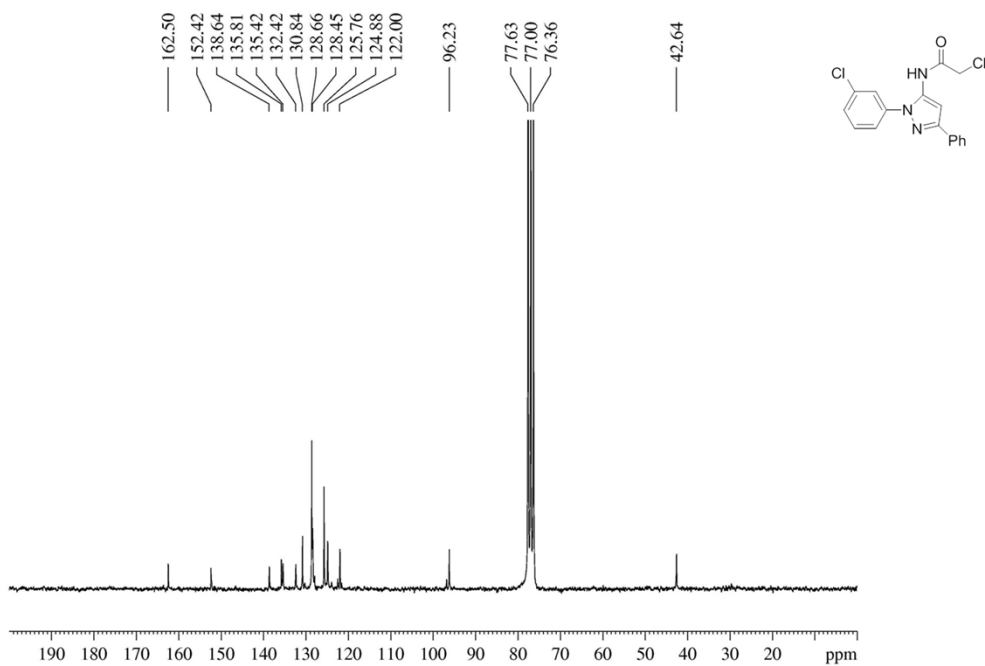

### 5-(2-Bromoacetyl-amino)-1-(3-chlorophenyl)-3-phenylpyrazole **33**

#### <sup>1</sup>H-NMR

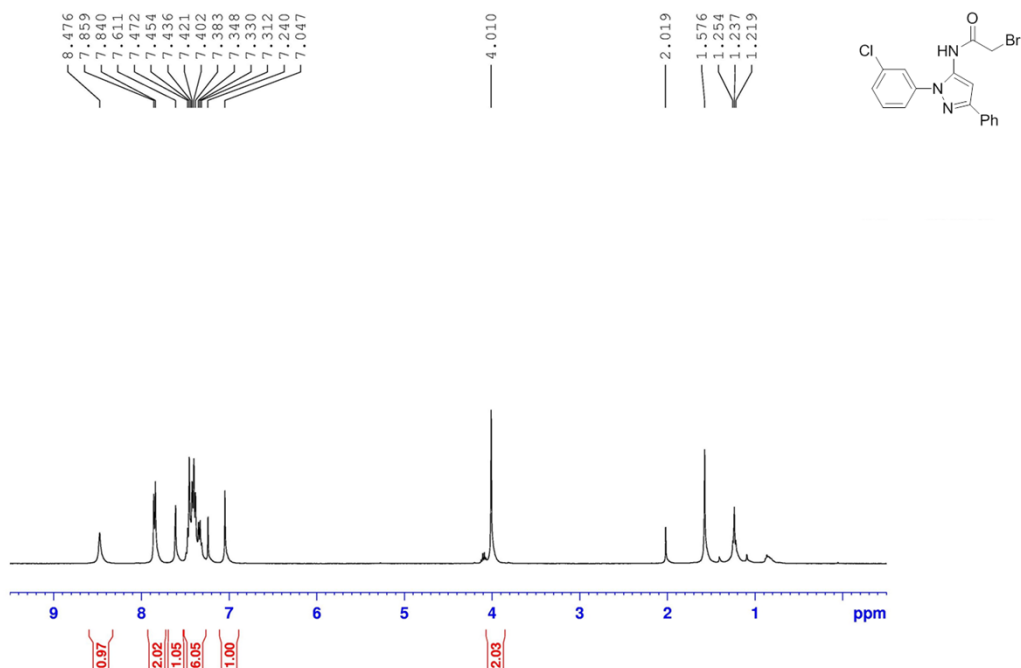

#### <sup>13</sup>C-NMR

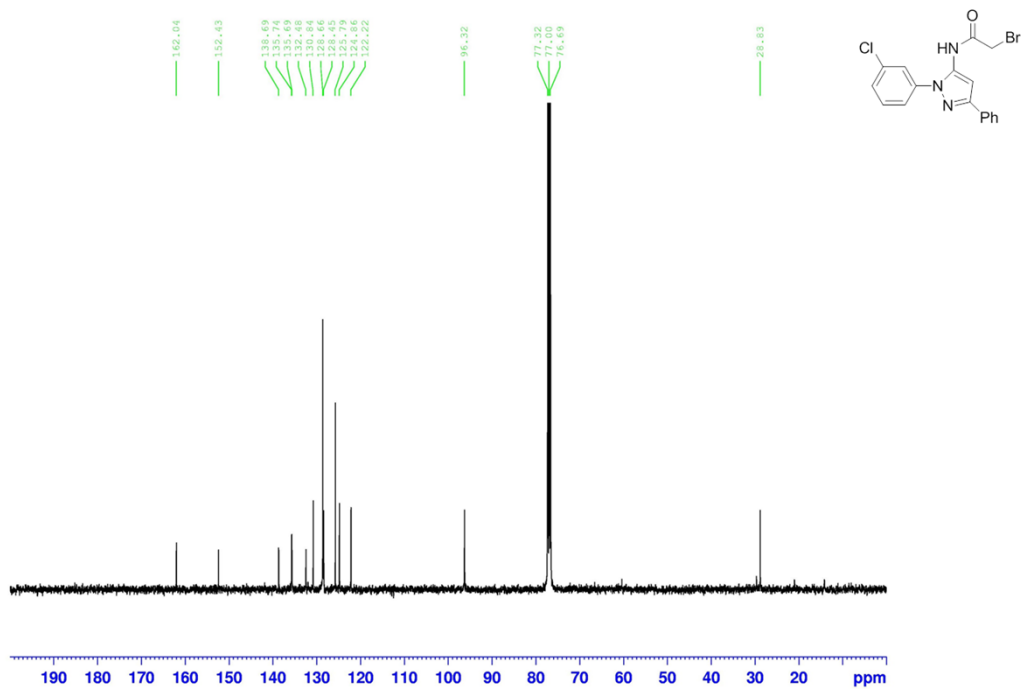

1-(3-Chlorophenyl)-5-(2-iodoacetylamino)-3-phenylpyrazole **34**

<sup>1</sup>H-NMR

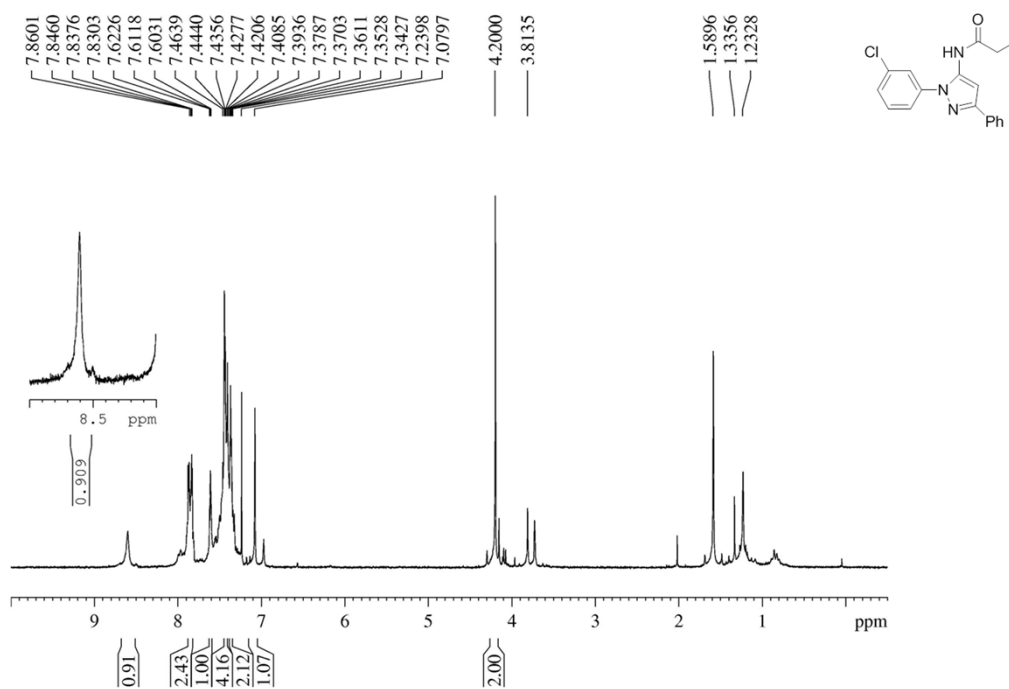

<sup>13</sup>C-NMR

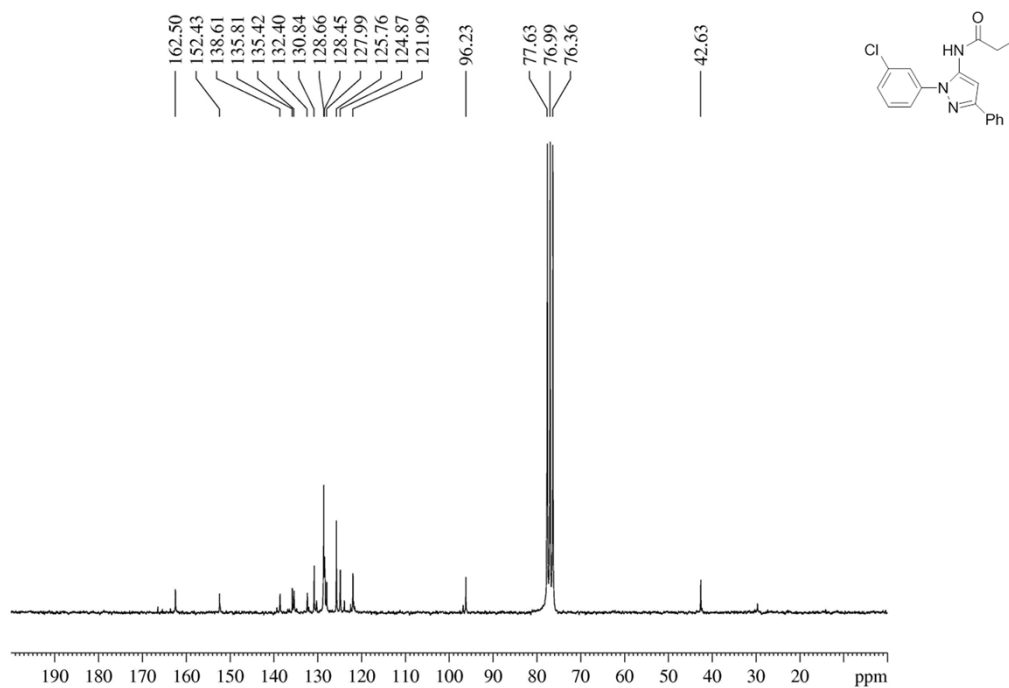

1-(3-Chlorophenyl)-5-(2-hydroxyacetylamino)-3-phenylpyrazole **35**

<sup>1</sup>H-NMR

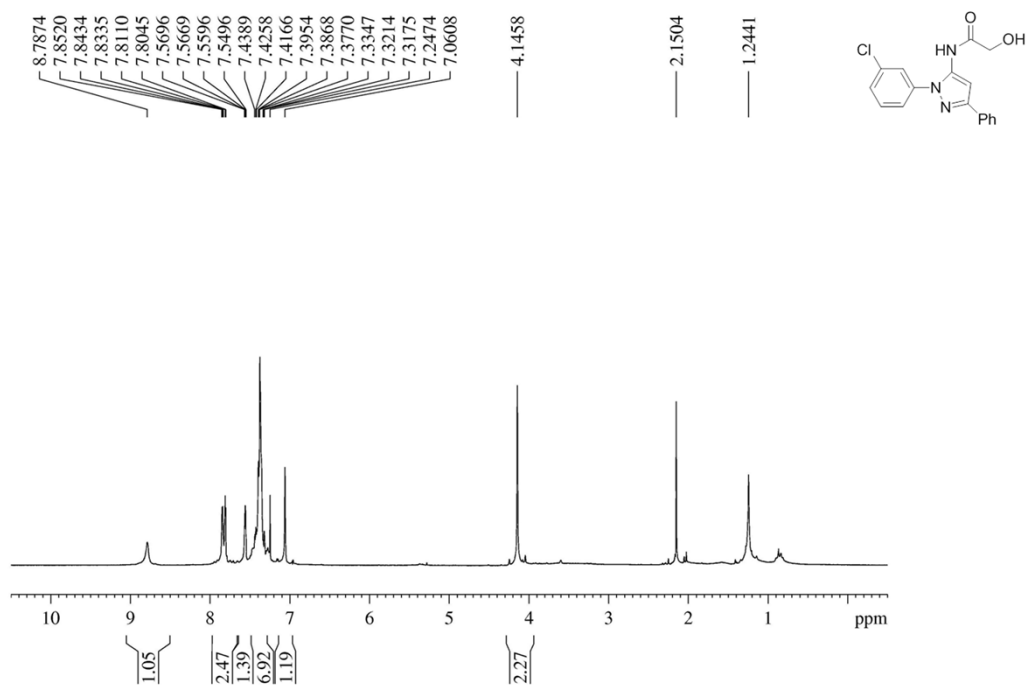

<sup>13</sup>C-NMR

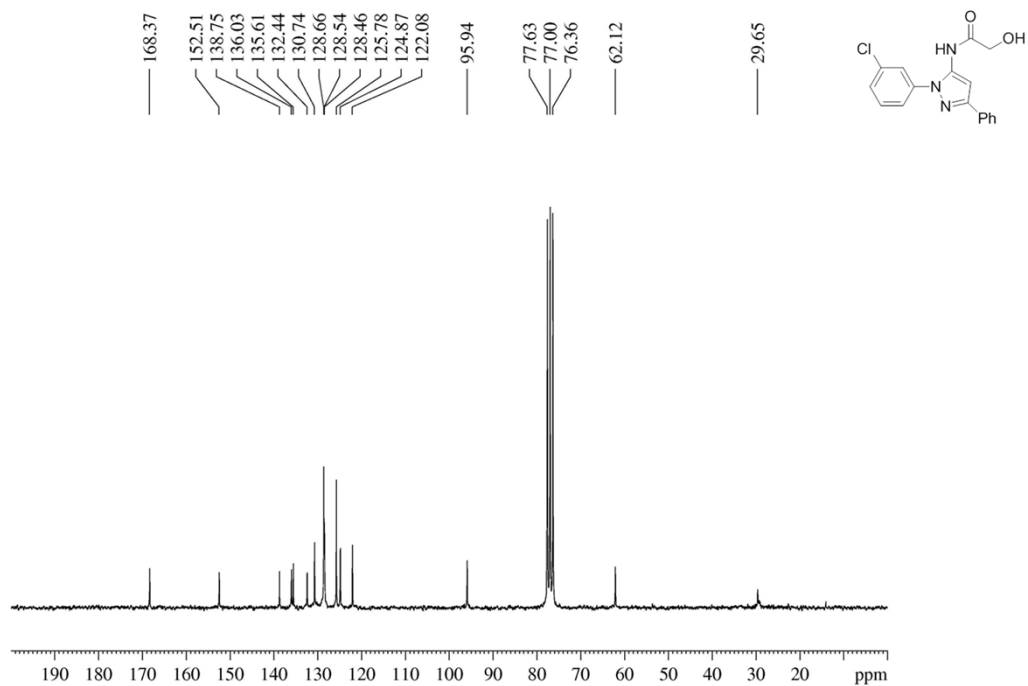

# <sup>1</sup>H and <sup>13</sup>C-NMR Spectra of Reported Compounds 17, 18–32, and 44

## 1,3-Diphenyl-6-[(formyloxy)methyl]-1*H*-pyrazolo[3,4-*d*] pyrimidine 17

### <sup>1</sup>H-NMR

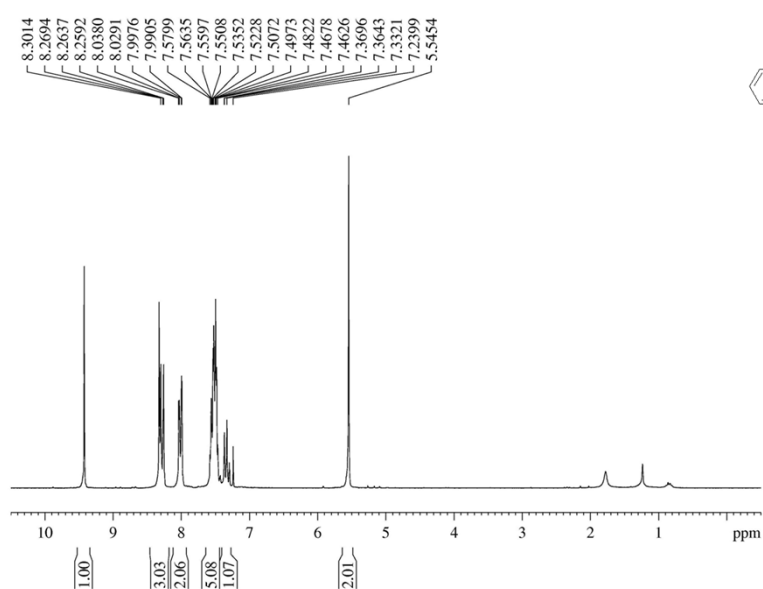

### <sup>13</sup>C-NMR

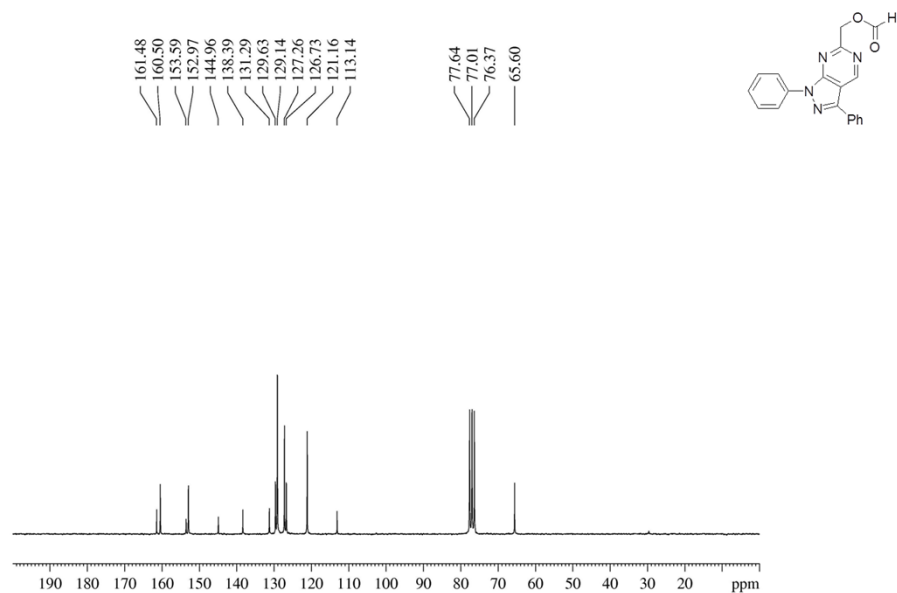

(1,3-Diphenyl-1*H*-pyrazolo[3,4-*d*]pyrimidin-6-yl)methanol **44**

<sup>1</sup>H-NMR

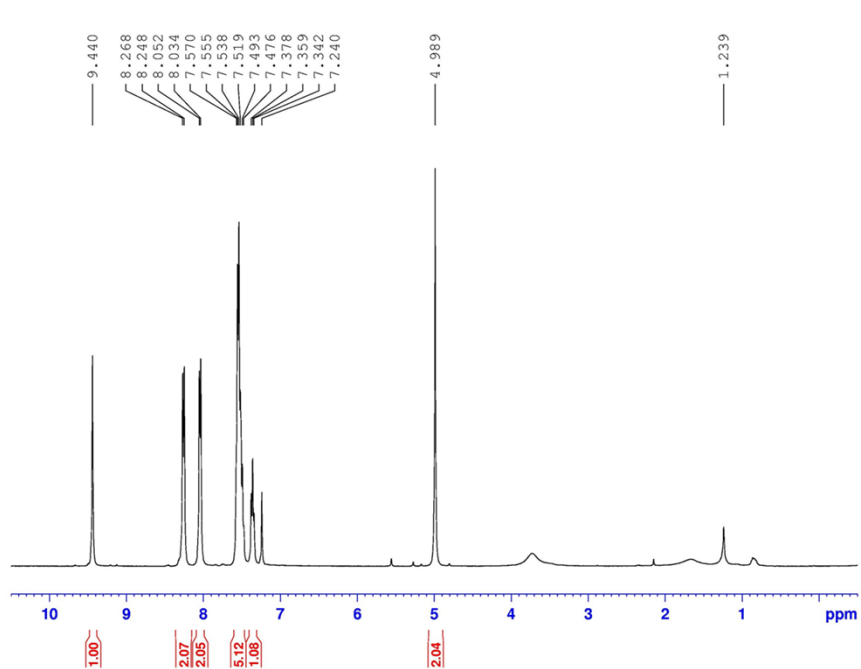

<sup>13</sup>C-NMR

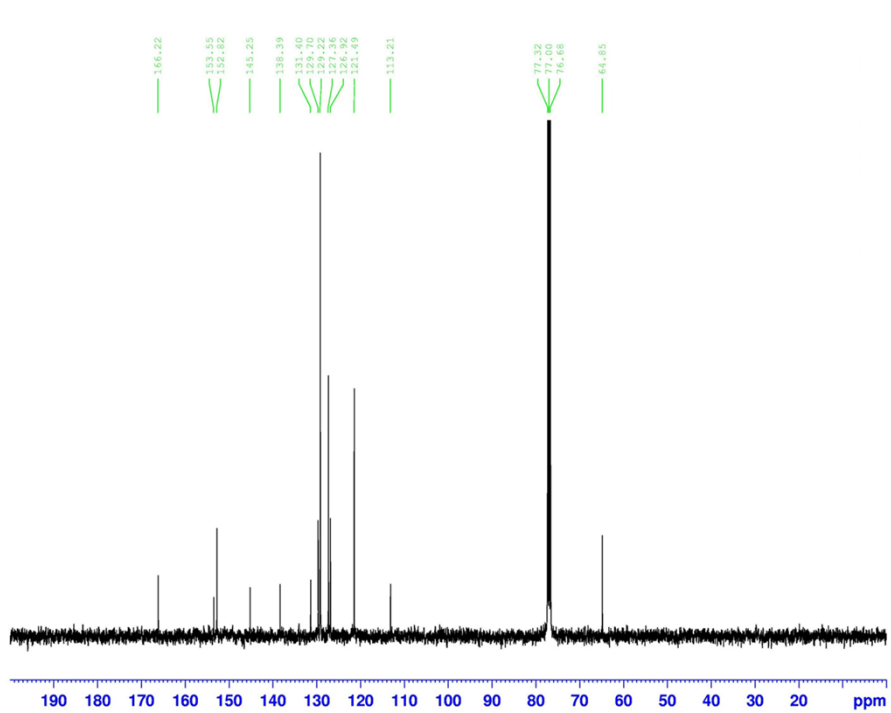

6-[(Formyloxy)methyl]-1-(2-methylphenyl)-3-phenyl-1*H*-pyrazolo[3,4-*d*]pyrimidine **18**

<sup>1</sup>H-NMR

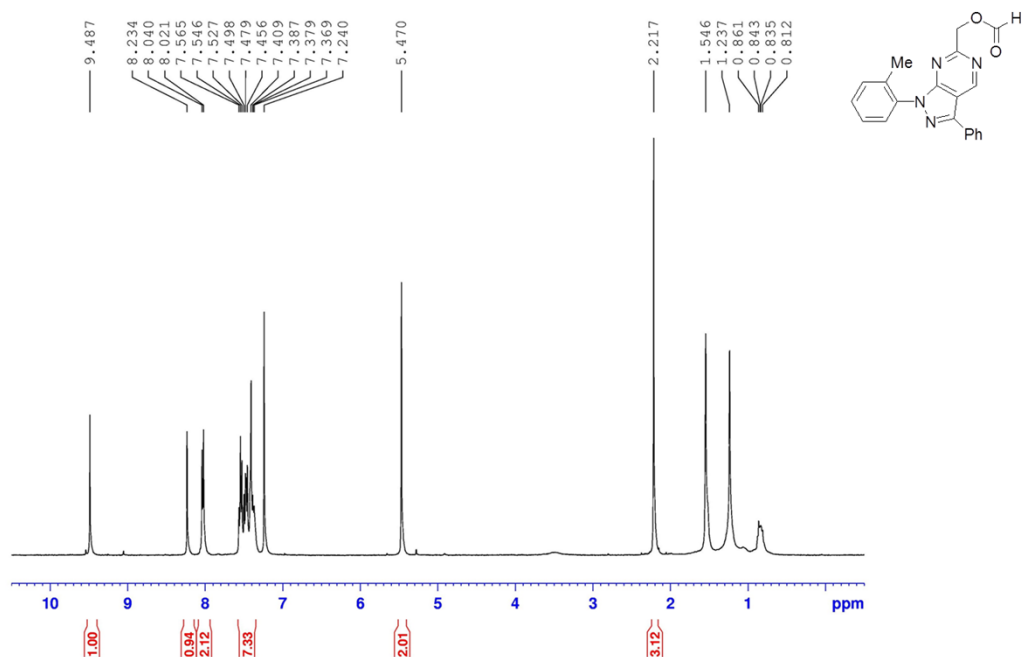

<sup>13</sup>C-NMR

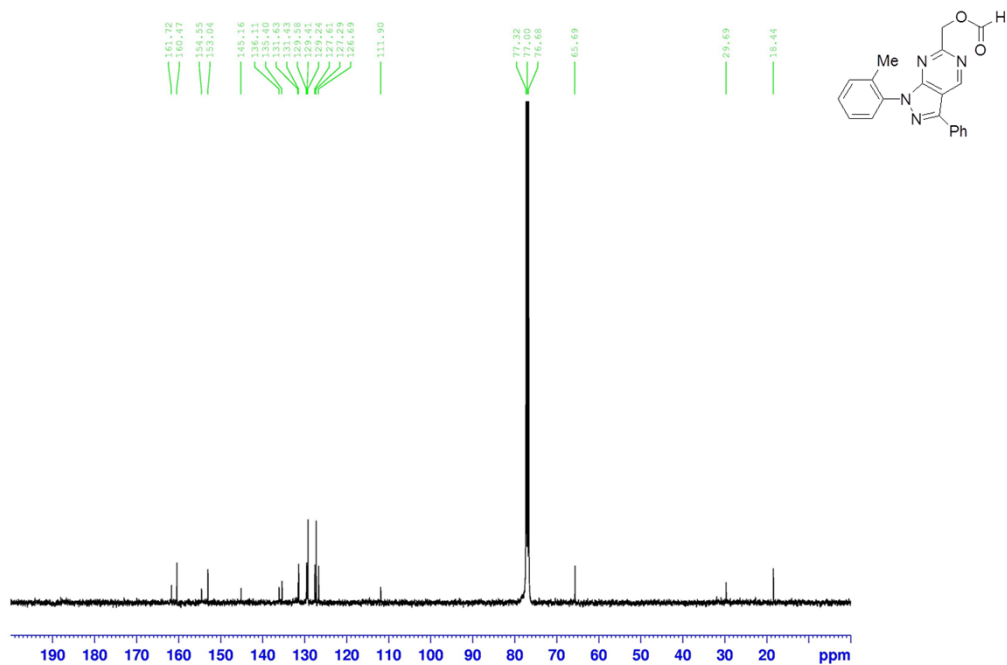

6-[(Formyloxy)methyl]-1-(3-methylphenyl)-3-phenyl-1*H*-pyrazolo[3,4-*d*]pyrimidine **19**

<sup>1</sup>H-NMR

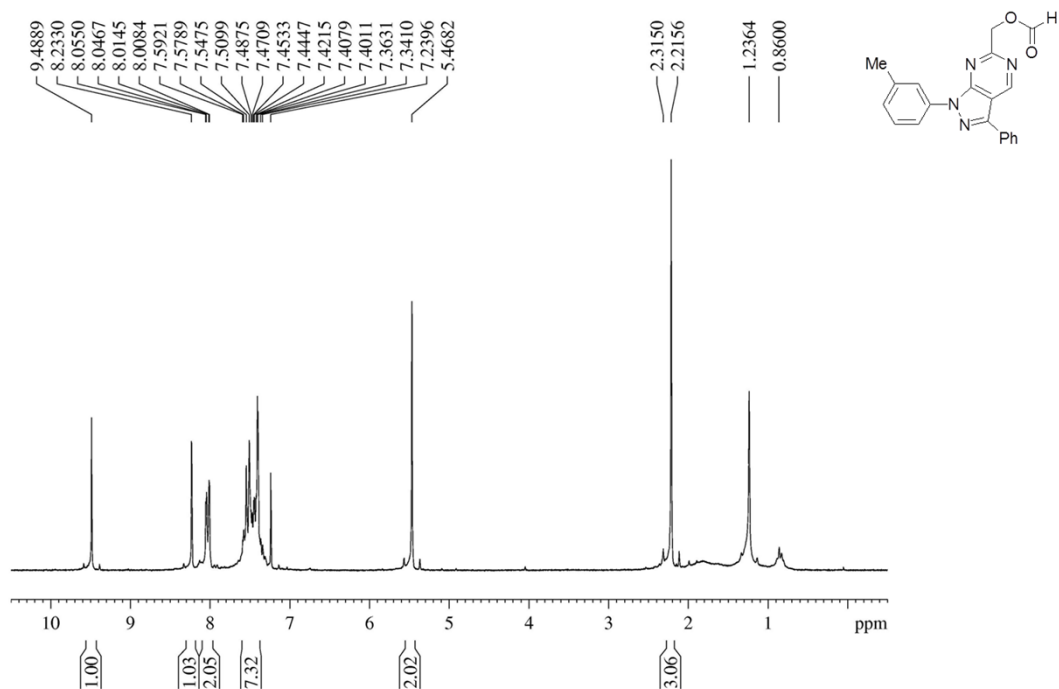

<sup>13</sup>C-NMR

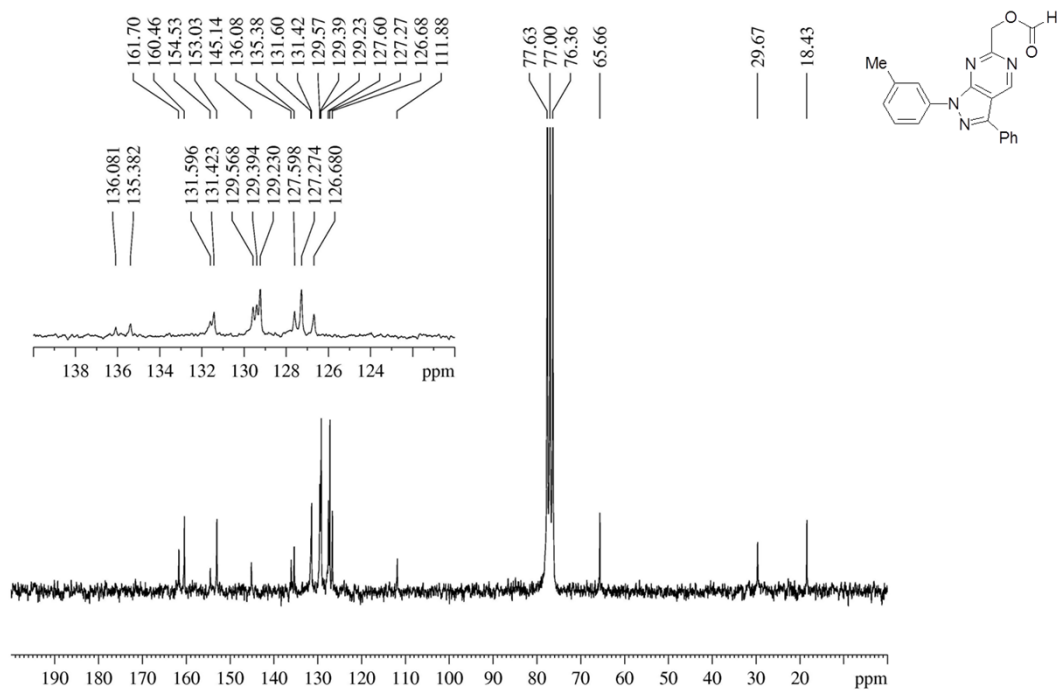



6-[(Formyloxy)methyl]-1-(4-methylphenyl)-3-phenyl-1*H*-pyrazolo[3,4-*d*]pyrimidine **20**

<sup>1</sup>H-NMR

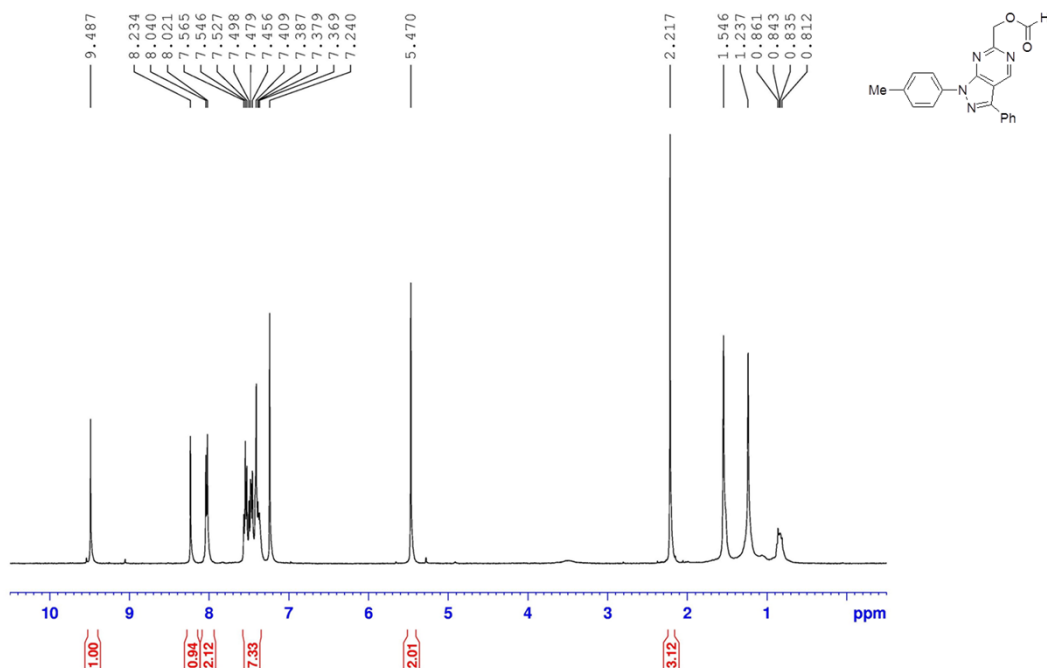

<sup>13</sup>C-NMR

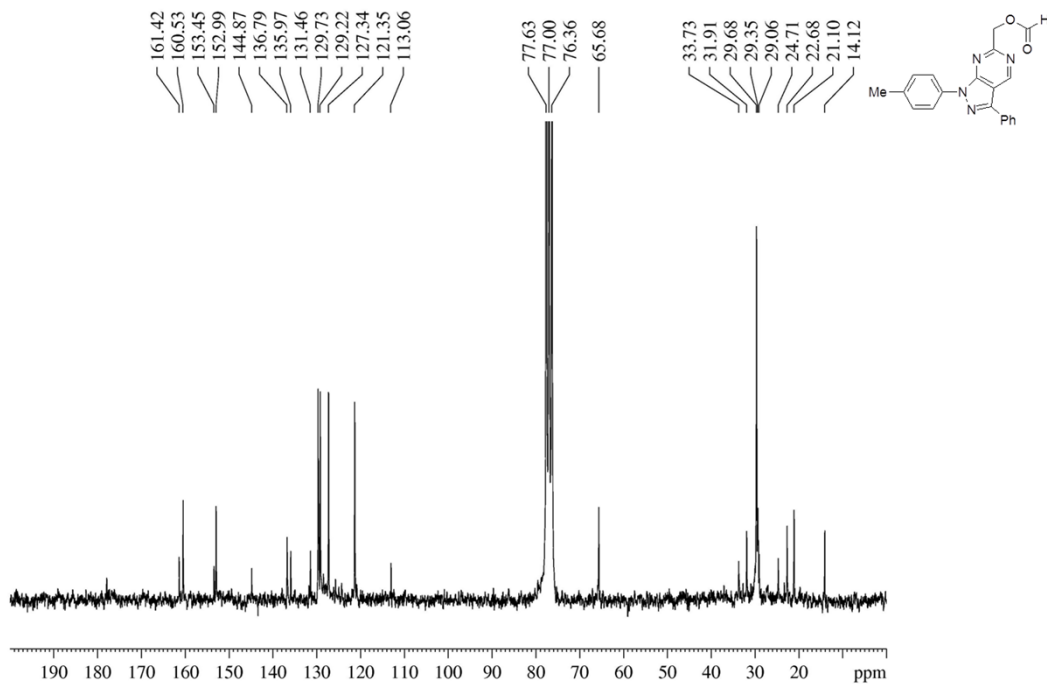

1-(2-Chlorophenyl)-6-[(formyloxy)methyl]-3-phenyl-1*H*-pyrazolo[3,4-*d*]pyrimidine **21**

<sup>1</sup>H-NMR

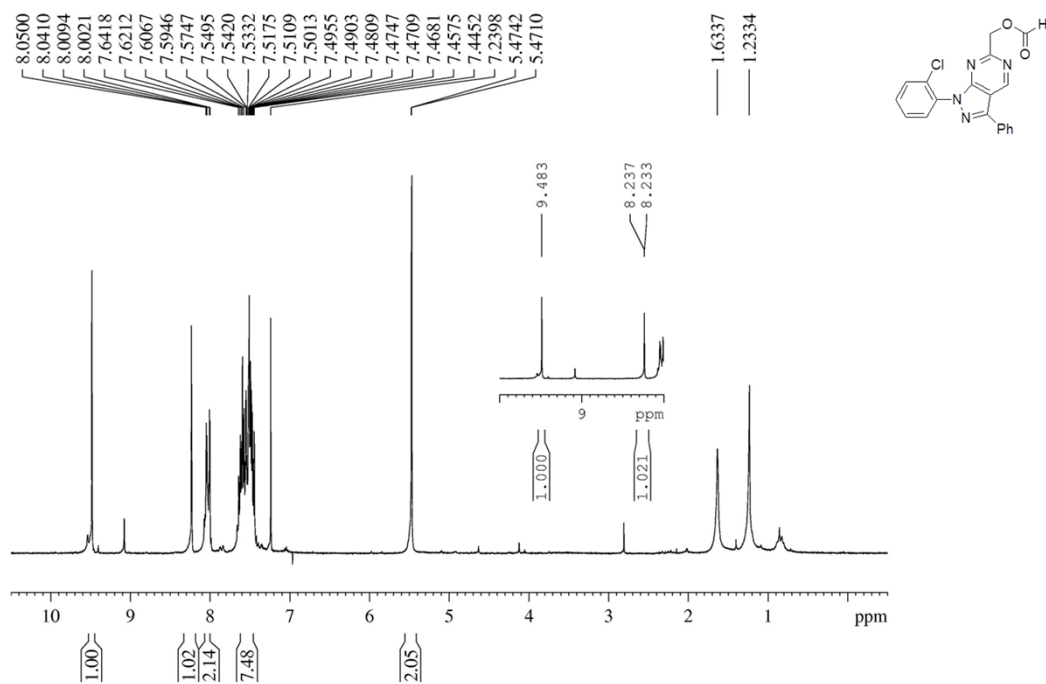

<sup>13</sup>C-NMR

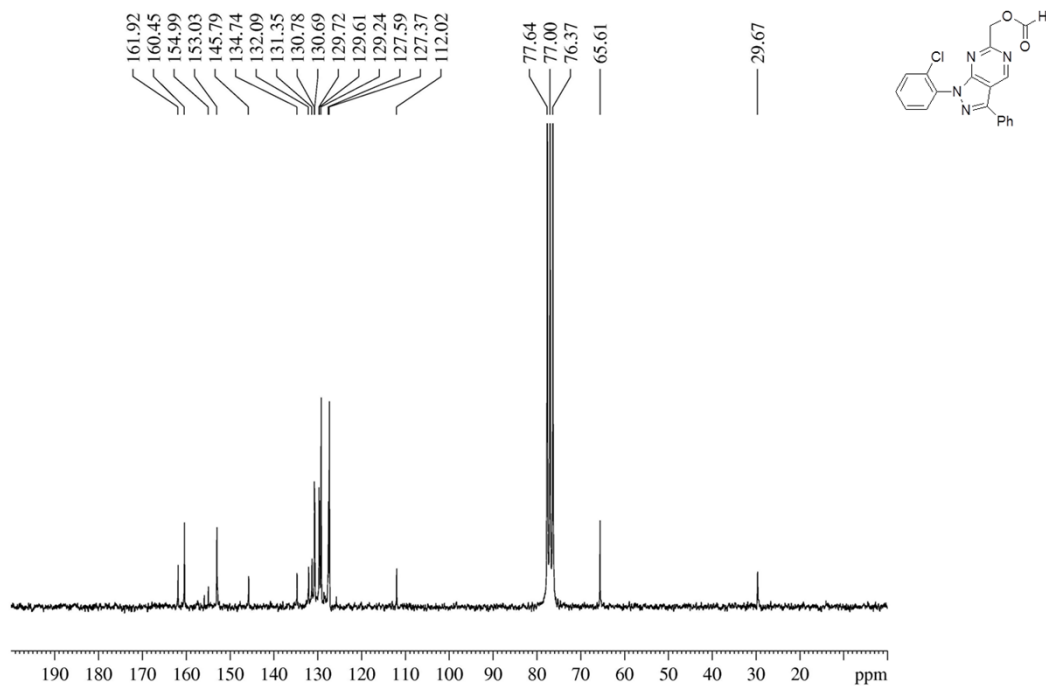

# 1-(3-Chlorophenyl)-6-[(formyloxy)methyl]-3-phenyl-1*H*-pyrazolo[3,4-*d*]pyrimidine **22**

## <sup>1</sup>H-NMR

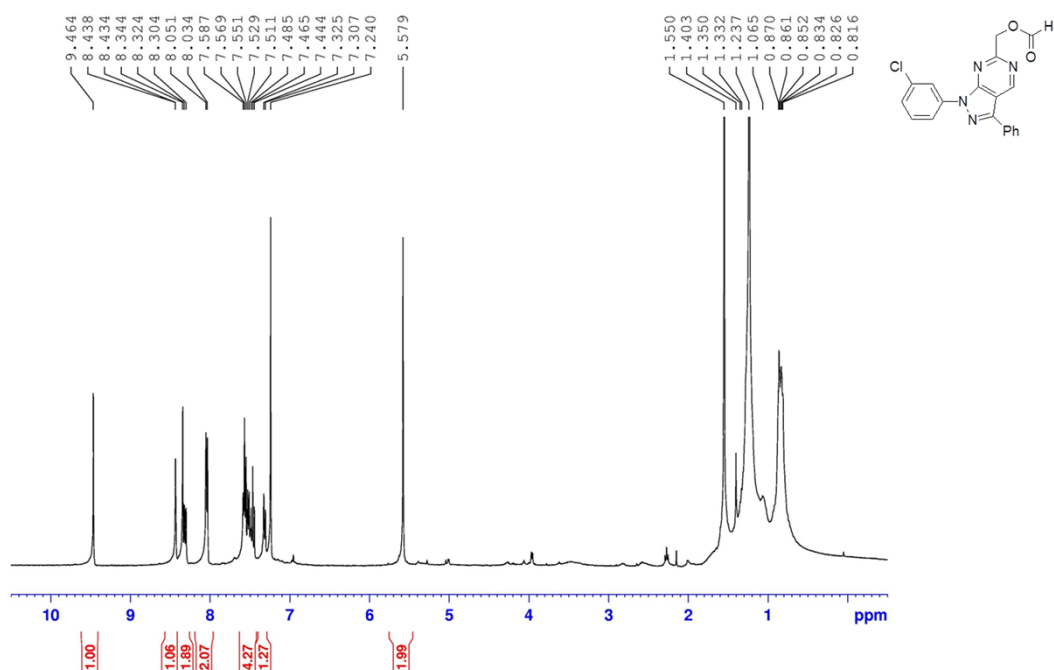

## <sup>13</sup>C-NMR

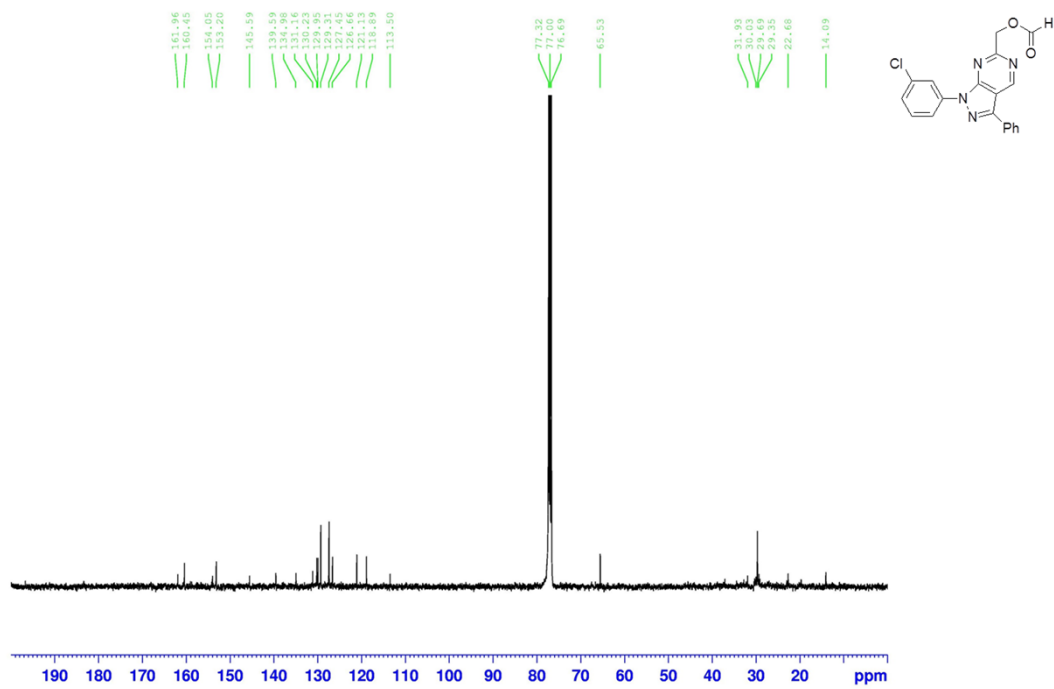

1-(4-Chlorophenyl)-6-[(formyloxy)methyl]-3-phenyl-1*H*-pyrazolo[3,4-*d*]pyrimidine **23**

<sup>1</sup>H-NMR

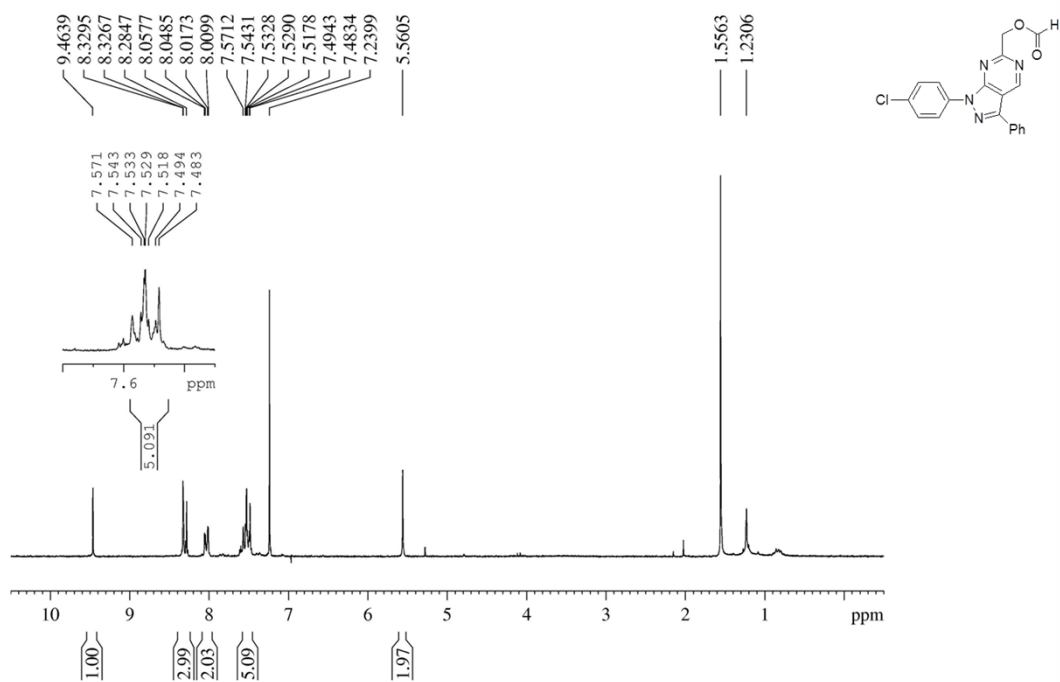

<sup>13</sup>C-NMR

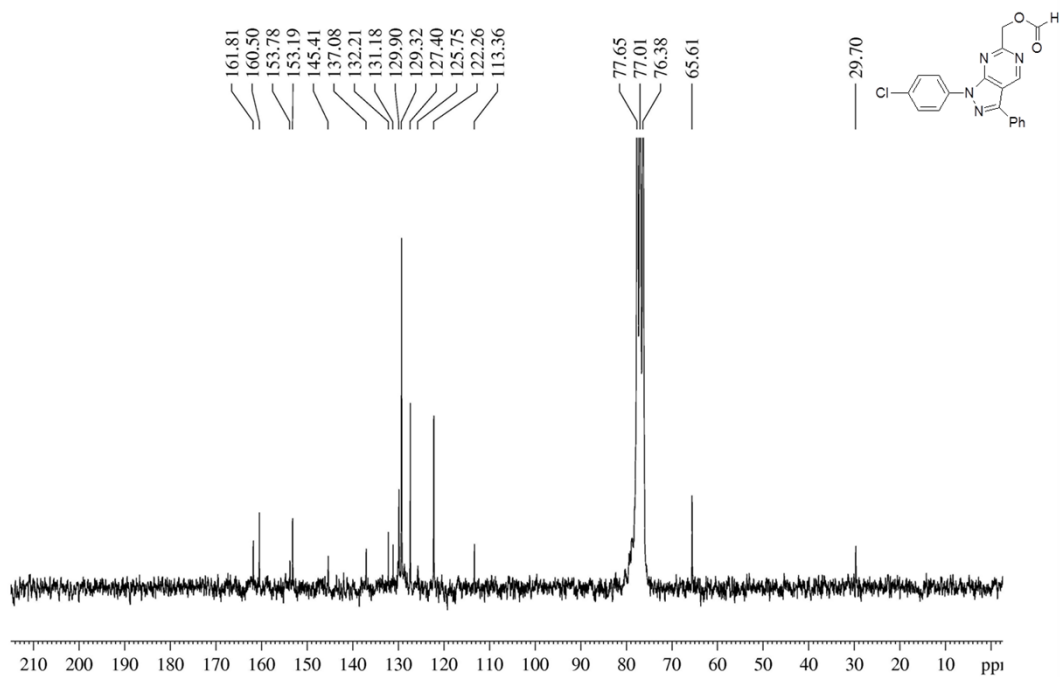

6-[(Formyloxy)methyl]-1-(3-methoxyphenyl)-3-phenyl-1*H*-pyrazolo[3,4-*d*]pyrimidine **24**

<sup>1</sup>H-NMR

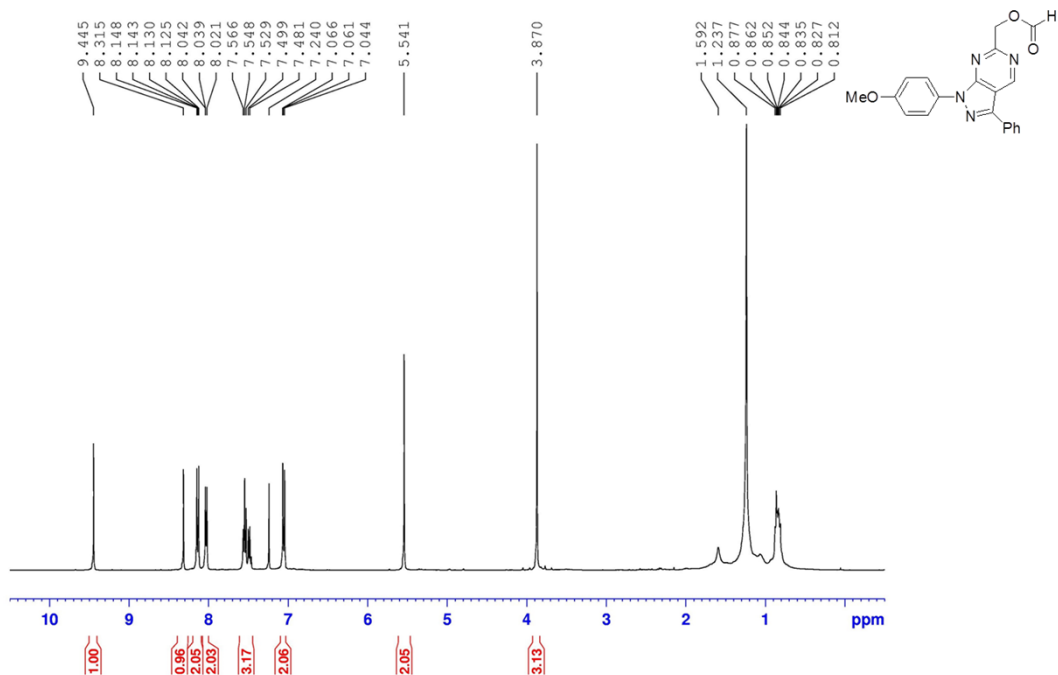

<sup>13</sup>C-NMR

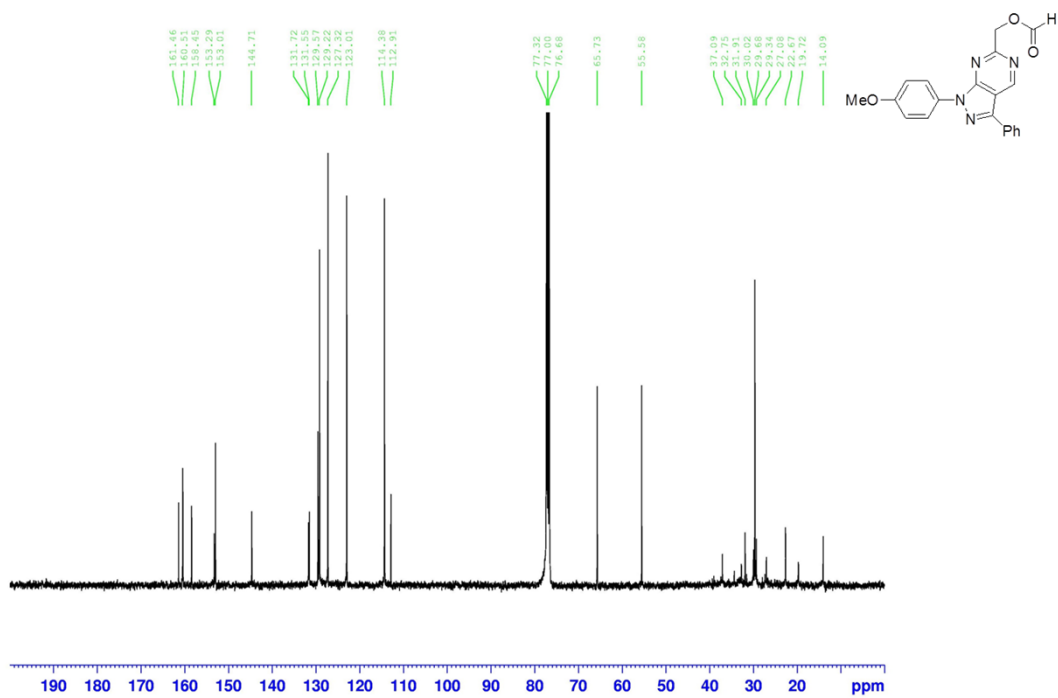

6-[(Formyloxy)methyl]-3-methyl-1-phenyl-1*H*-pyrazolo[3,4-*d*]pyrimidine **25**

<sup>1</sup>H-NMR

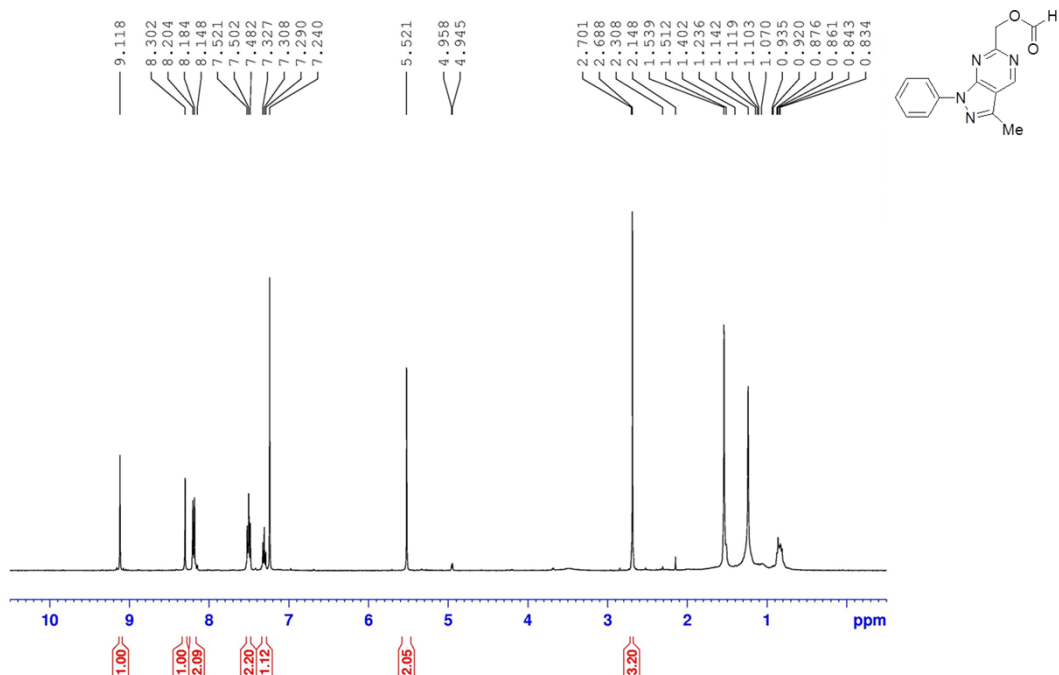

<sup>13</sup>C-NMR

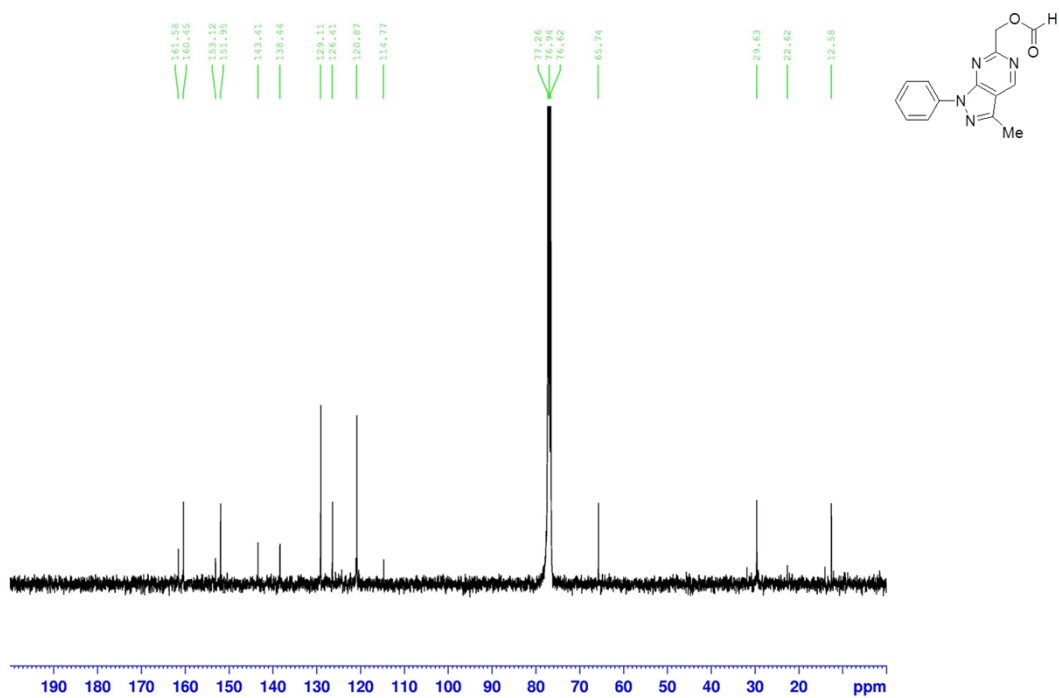

3-Tetrabutyl-6-[(formyloxy)methyl]-1-phenyl-1*H*-pyrazolo[3,4-*d*]pyrimidine **26**

<sup>1</sup>H-NMR

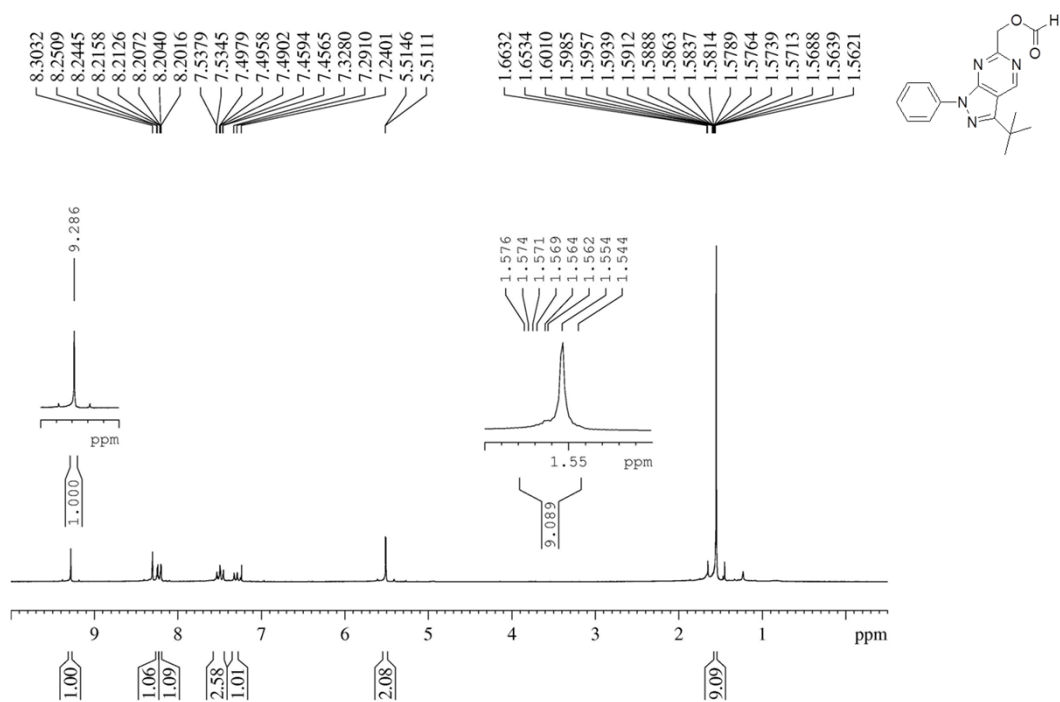

<sup>13</sup>C-NMR

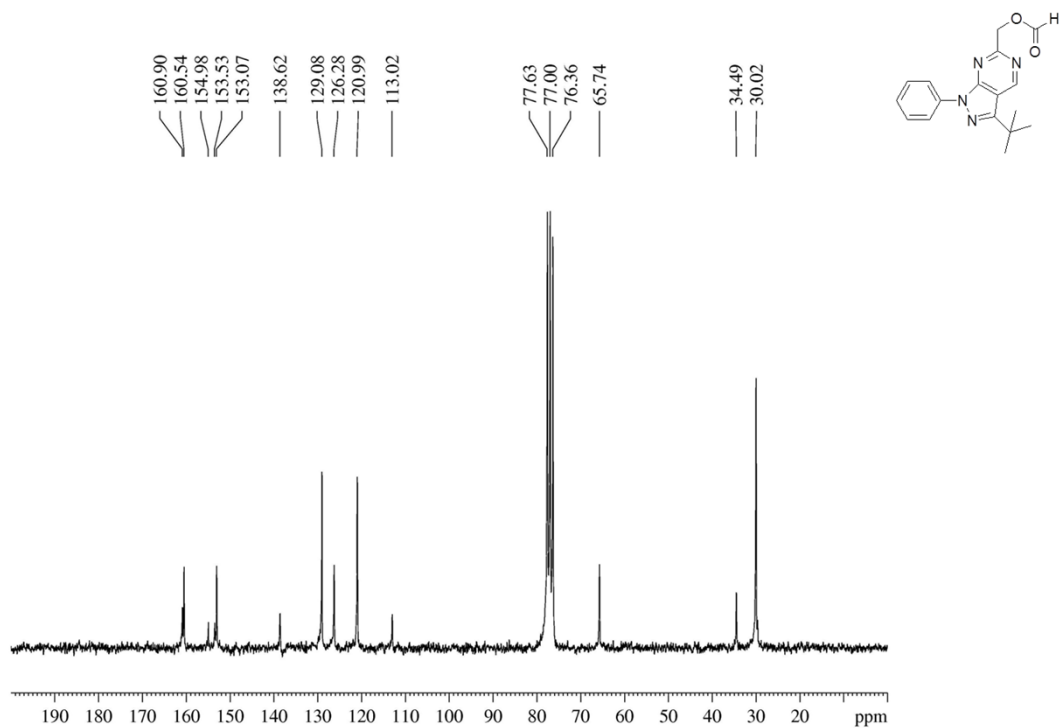

6-[(Formyloxy)methyl]-3-(4-methylphenyl)-1-phenyl-1H-pyrazolo[3,4-d]pyrimidine **27**

**<sup>1</sup>H-NMR**

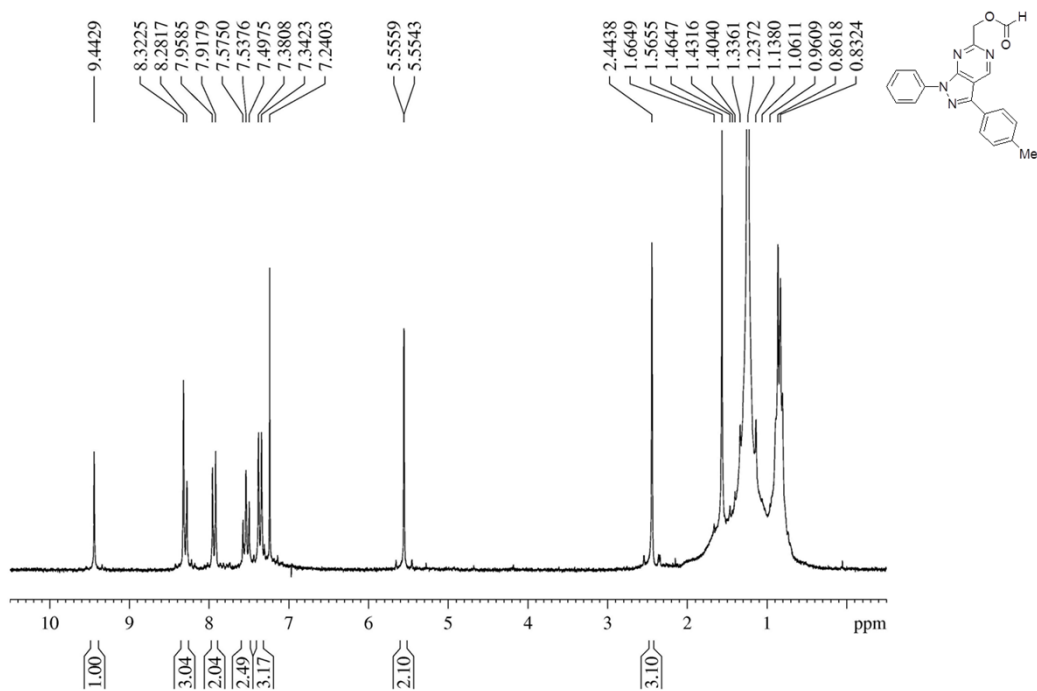

**<sup>13</sup>C-NMR**

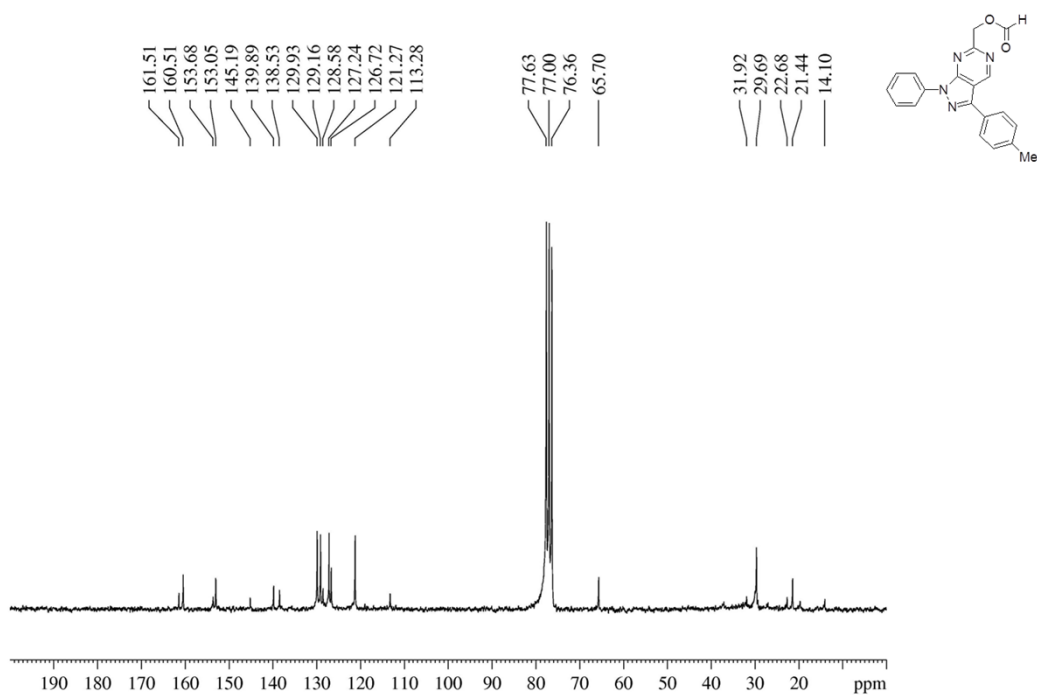



6-[(Formyloxy)methyl]-3-(4-methoxyphenyl)-1-phenyl-1*H*-pyrazolo[3,4-*d*]pyrimidine **28**

<sup>1</sup>H-NMR

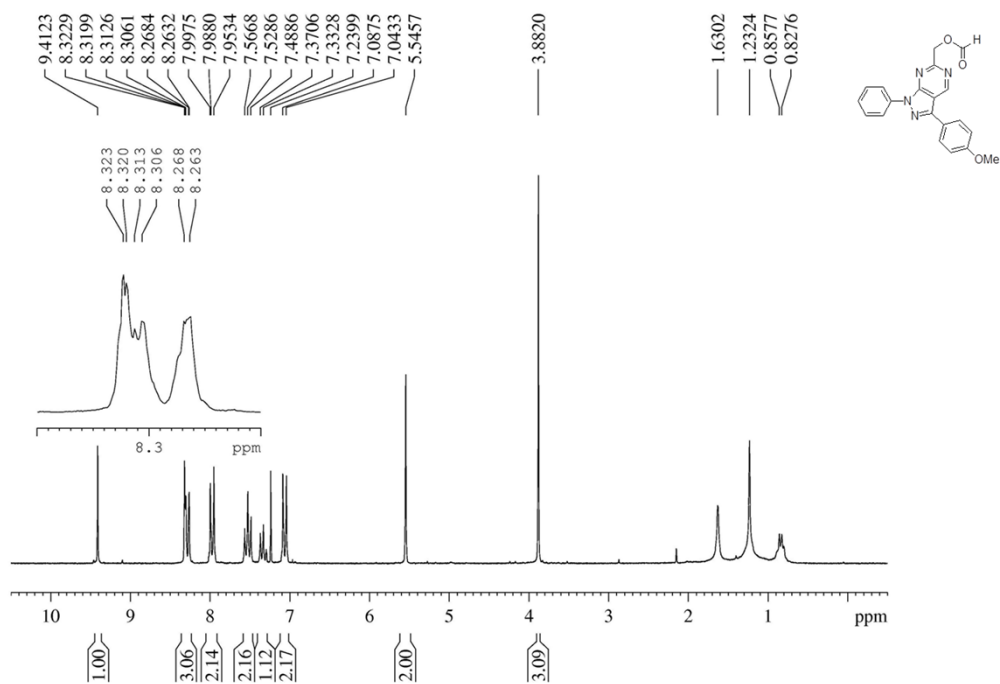

<sup>13</sup>C-NMR

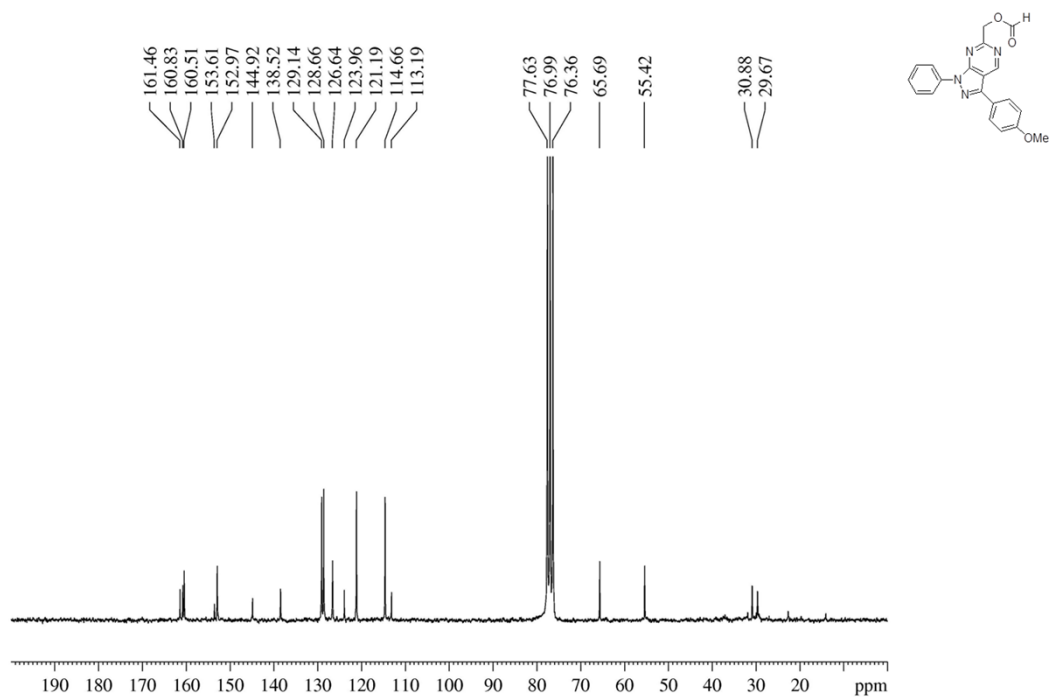

6-[(Formyloxy)methyl]-1-(3-methylphenyl)-3-(4-methoxyphenyl)-1*H*-pyrazolo[3,4-*d*]pyrimidine **29**

<sup>1</sup>H-NMR

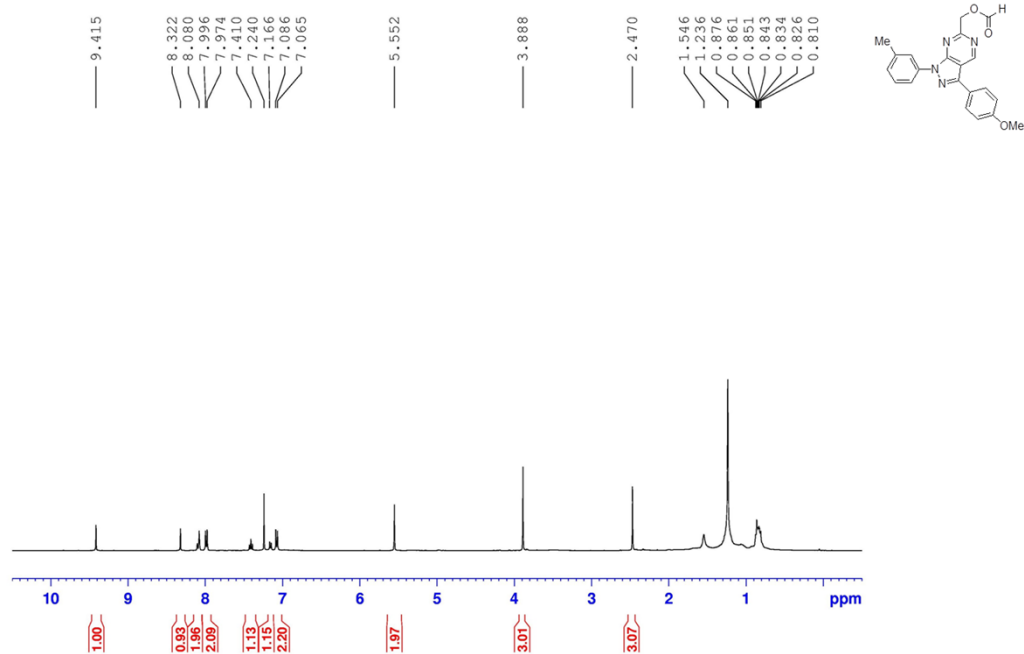

<sup>13</sup>C-NMR

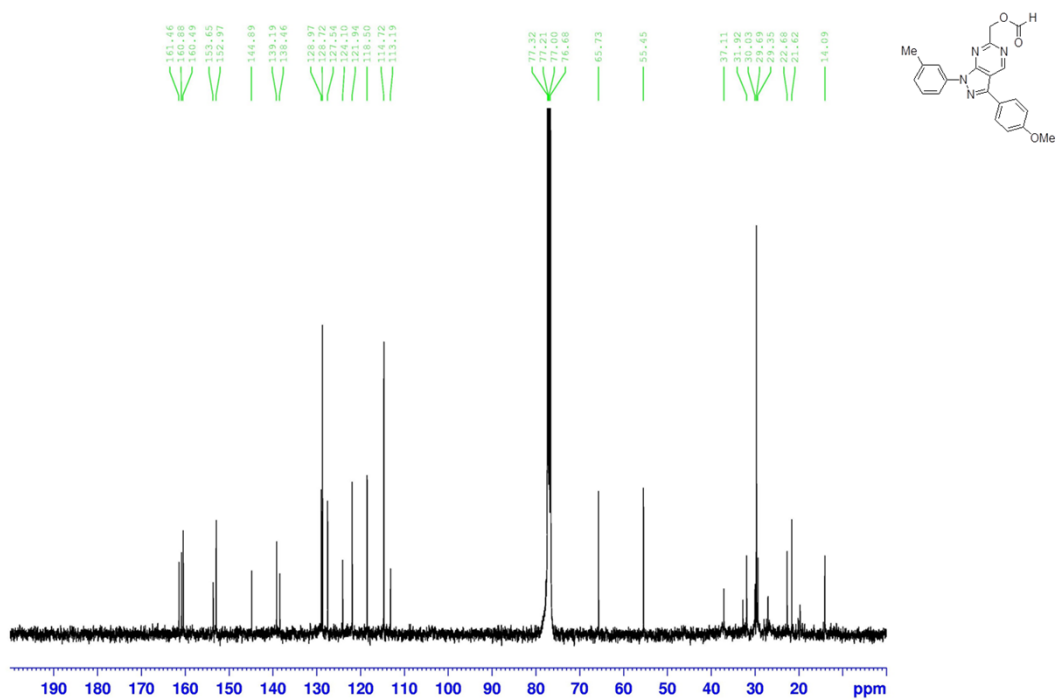

6-[(Formyloxy)methyl]-1-(4-methylphenyl)-3-(4-methoxyphenyl)-1*H*-pyrazolo[3,4-*d*]pyrimidine **30**

<sup>1</sup>H-NMR

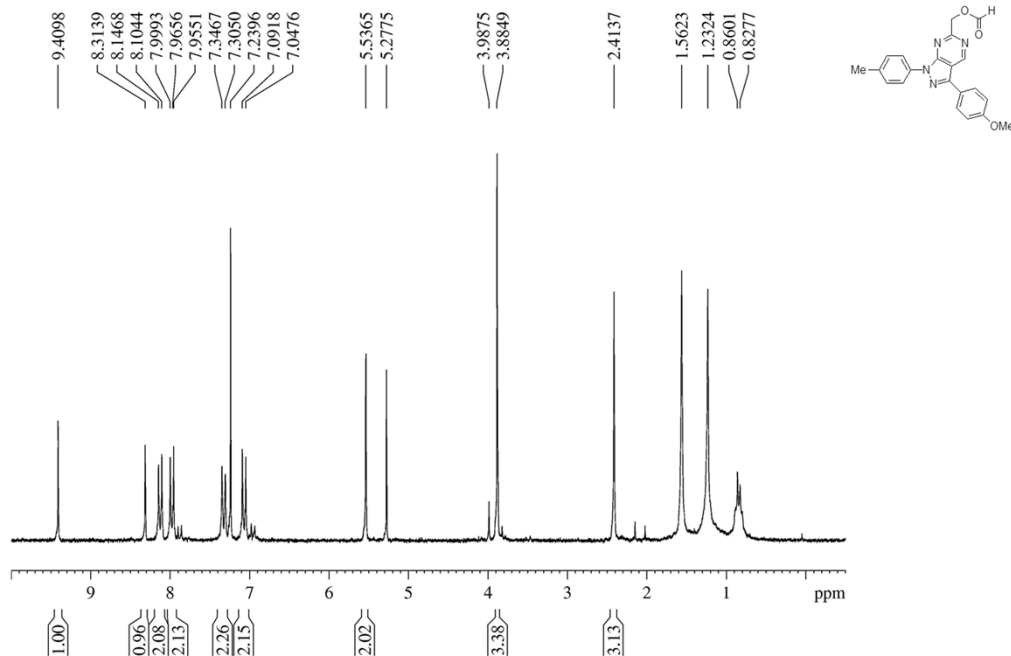

<sup>13</sup>C-NMR

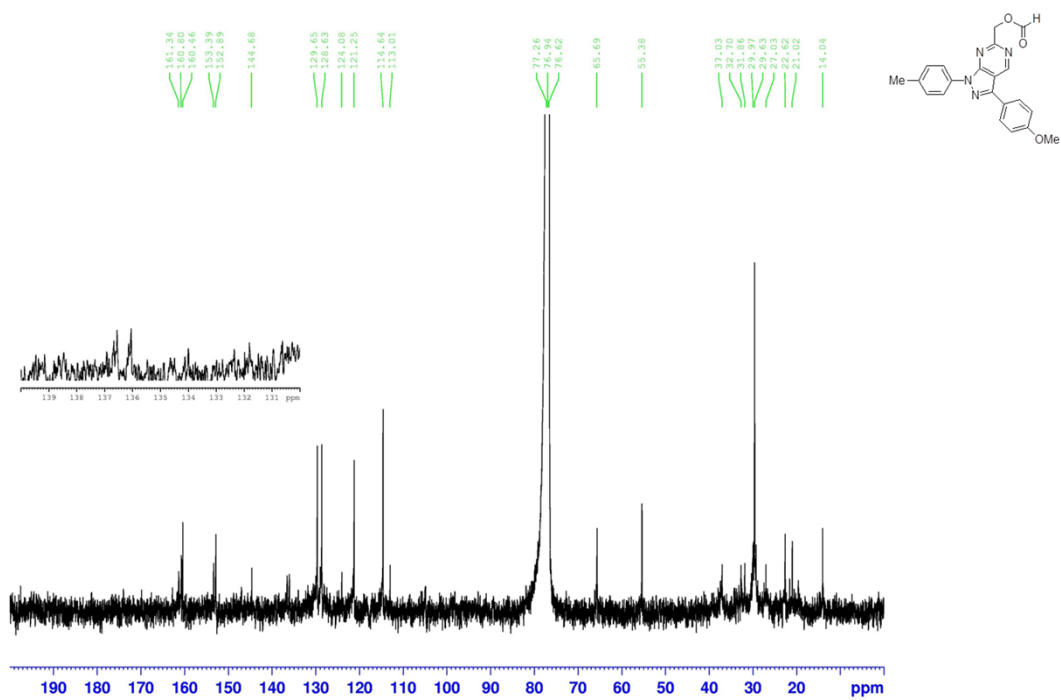

6-[(Formyloxy)methyl]-1-(2-methylphenyl)-3-(4-methoxyphenyl)-1*H*-pyrazolo[3,4-*d*]pyrimidine **31**

<sup>1</sup>H-NMR

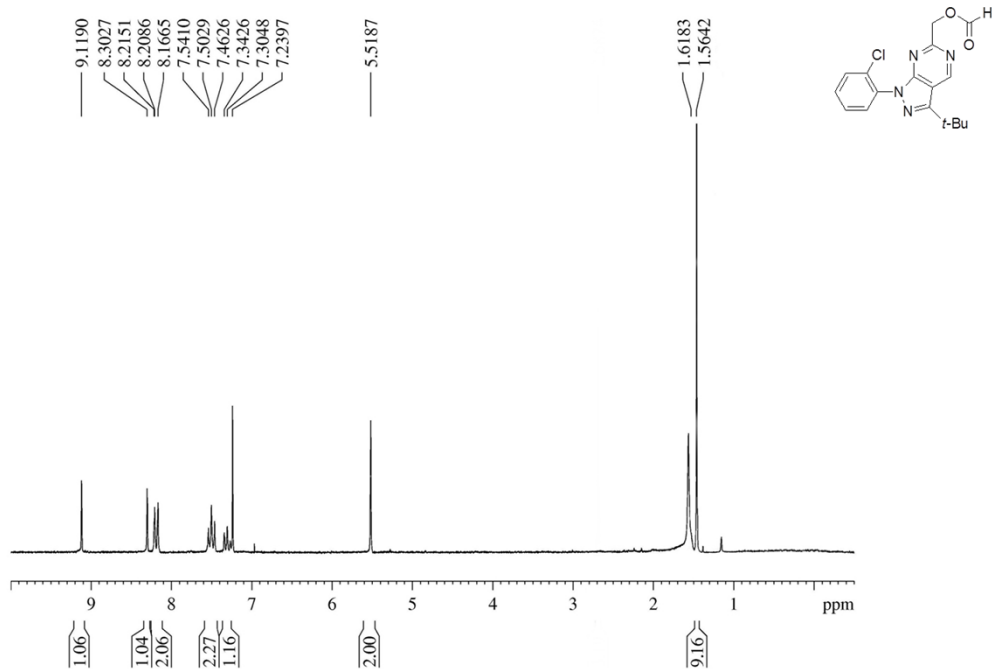

<sup>13</sup>C-NMR

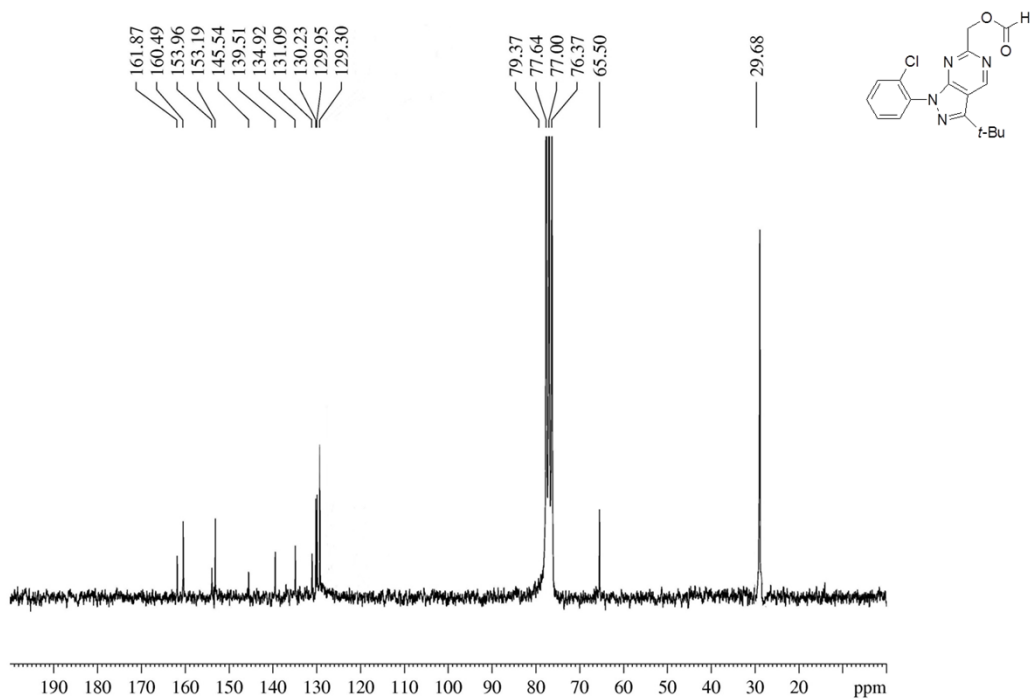

6-[(Formyloxy)methyl]-1-(4-methylphenyl)-3-(4-methoxyphenyl)-1*H*-pyrazolo[3,4-*d*]pyrimidine **32**

<sup>1</sup>H-NMR

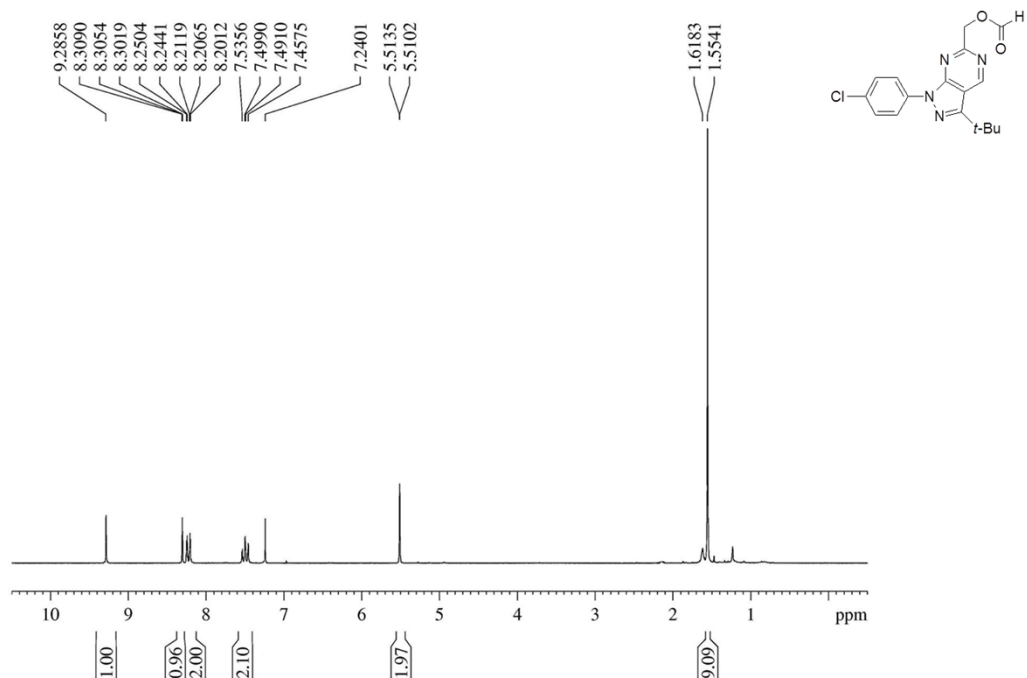

<sup>13</sup>C-NMR

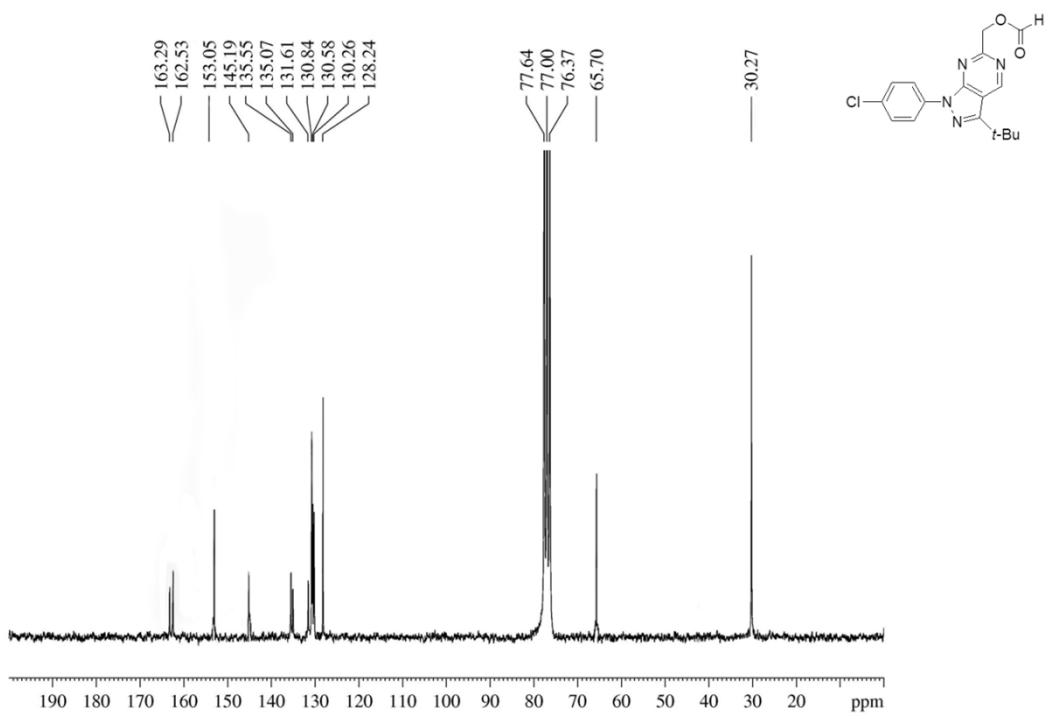

# <sup>1</sup>H-NMR and <sup>13</sup>C-NMR of 5-(2-haloacetyl)pyrazoles 6 and 33–35

5-(2-Chloroacetyl)amino)-1-(3-chlorophenyl)-3-phenylpyrazole 6

## <sup>1</sup>H-NMR

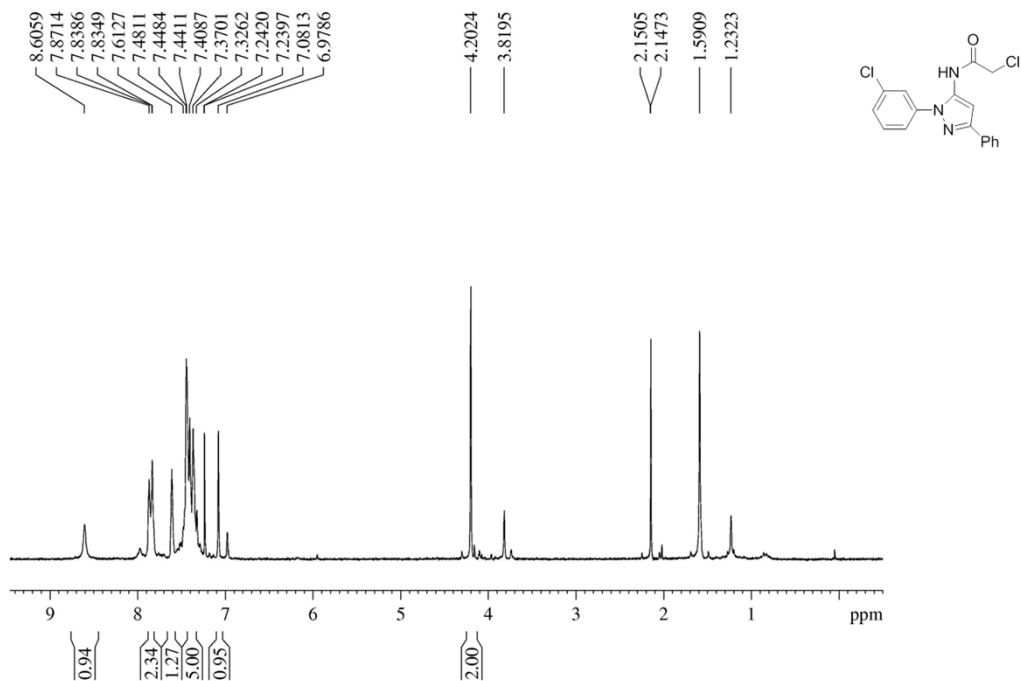

## <sup>13</sup>C-NMR

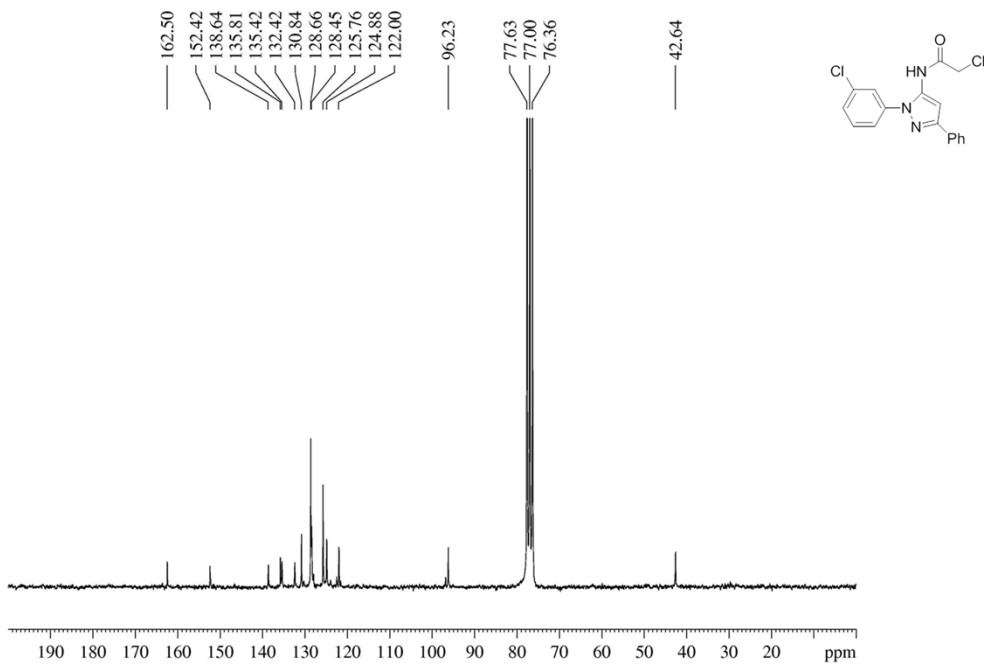

### 5-(2-Bromoacetylamino)-1-(3-chlorophenyl)-3-phenylpyrazole **33**

#### <sup>1</sup>H-NMR

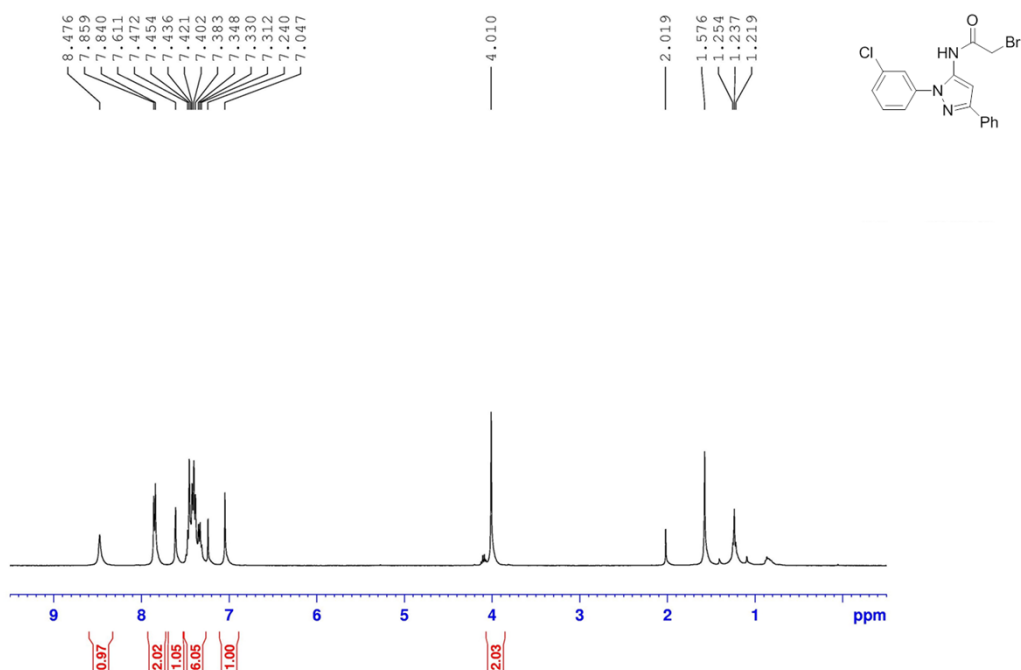

#### <sup>13</sup>C-NMR



1-(3-Chlorophenyl)-5-(2-iodoacetylamino)-3-phenylpyrazole **34**

<sup>1</sup>H-NMR



<sup>13</sup>C-NMR





# 1-(3-Chlorophenyl)-5-(2-hydroxyacetyl-amino)-3-phenylpyrazole **35**

## <sup>1</sup>H-NMR



## <sup>13</sup>C-NMR



# 6-(Chloromethyl)pyrazolo[3,4-*d*]pyrimidine 40

## <sup>1</sup>H-NMR

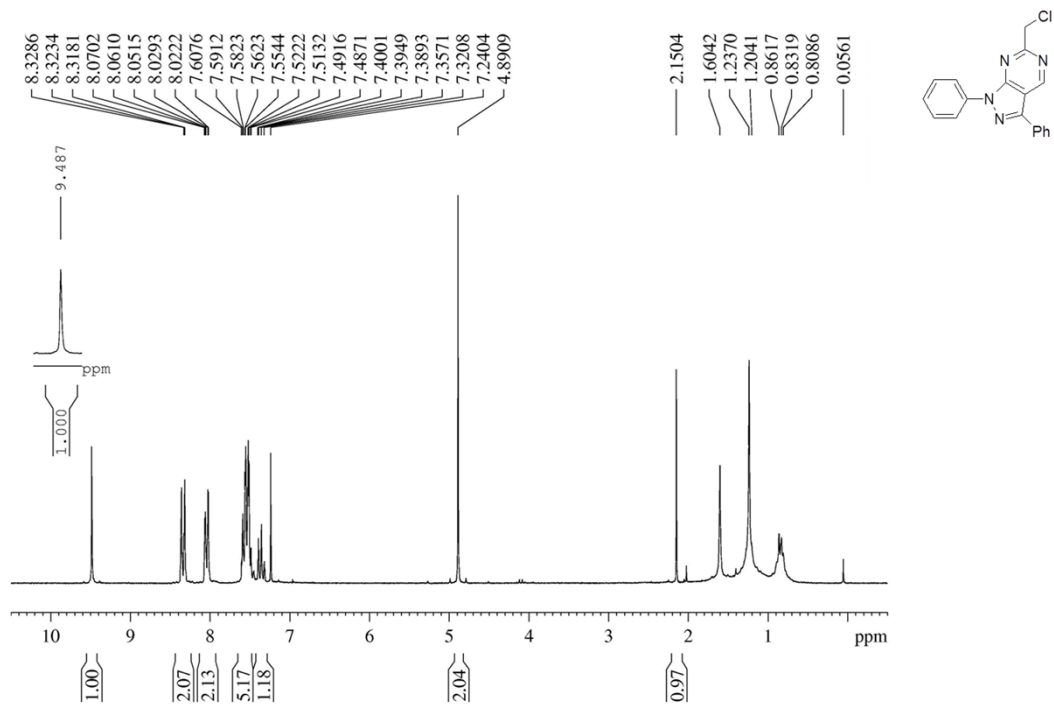

## <sup>13</sup>C-NMR

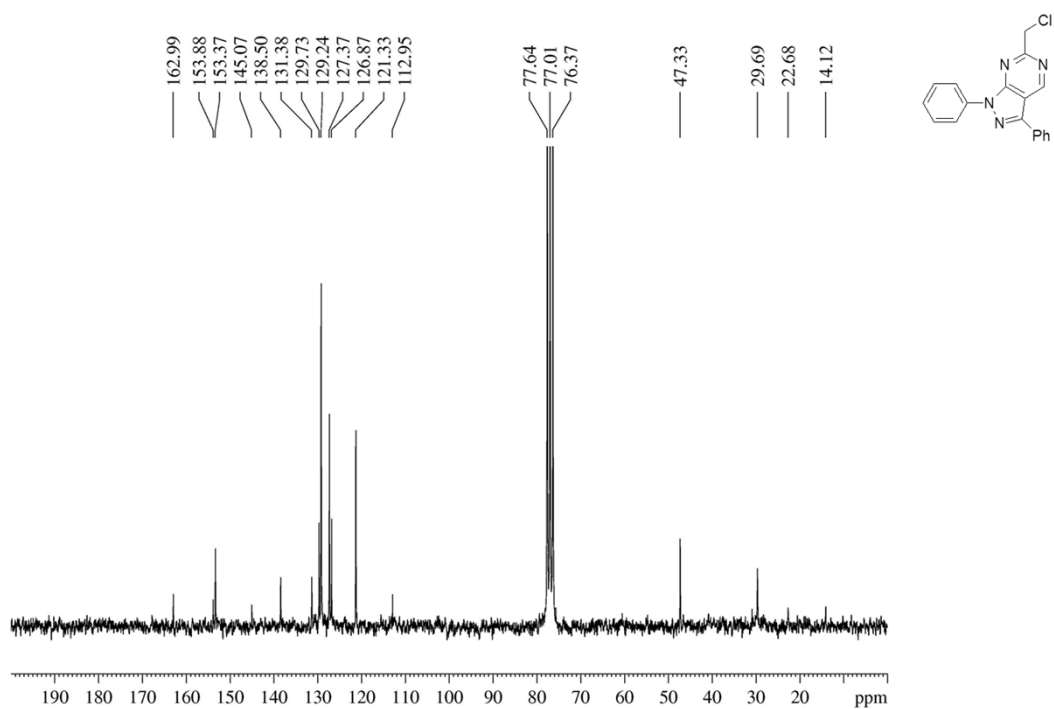

**X-Ray data of 6-[(Formyloxy)methyl]-1-(3-methoxyphenyl)-3-phenyl-1*H*-pyrazolo[3,4-*d*]pyrimidine 24**

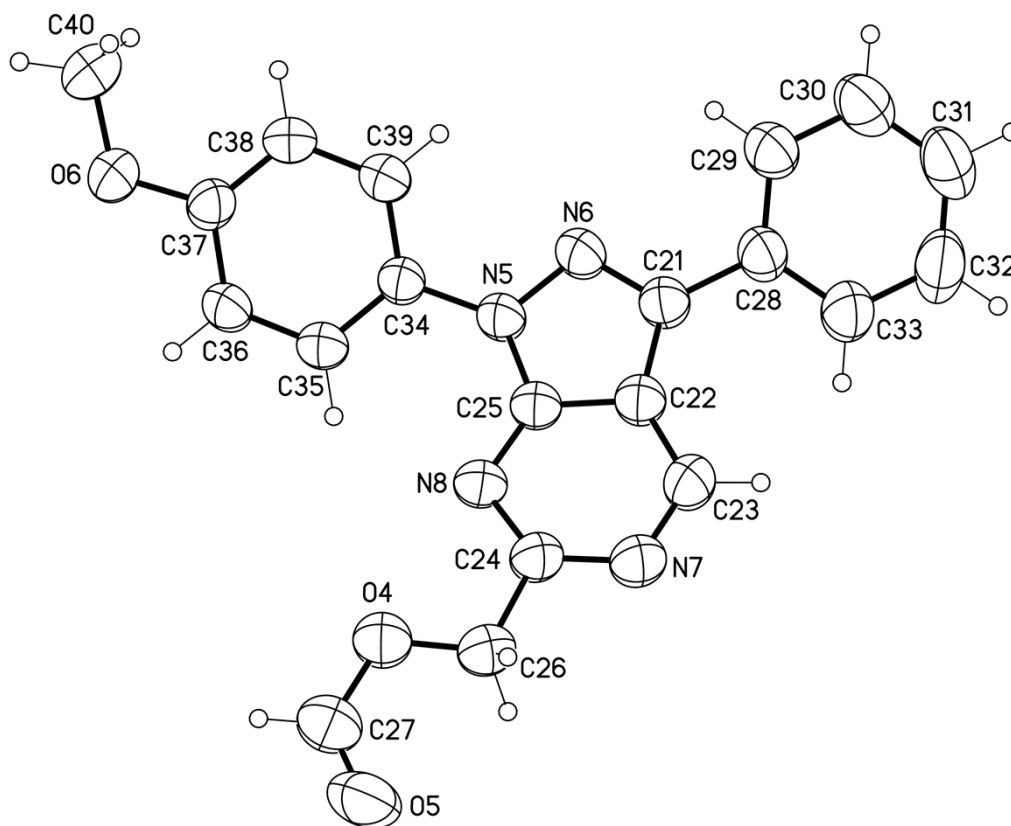

Table 1. Crystal data and structure refinement for 130527 (CCDC 1027455).

|                        |                                                               |                 |
|------------------------|---------------------------------------------------------------|-----------------|
| Identification code    | 130527                                                        |                 |
| Empirical formula      | C <sub>20</sub> H <sub>16</sub> N <sub>4</sub> O <sub>3</sub> |                 |
| Formula weight         | 360.37                                                        |                 |
| Temperature            | 100(2) K                                                      |                 |
| Wavelength             | 1.54178 Å                                                     |                 |
| Crystal system         | Monoclinic                                                    |                 |
| Space group            | P 1 21/n 1                                                    |                 |
| Unit cell dimensions   | a = 14.1926(3) Å                                              | ∠ = 90°.        |
|                        | b = 7.2123(2) Å                                               | ∠ = 98.900(2)°. |
|                        | c = 34.1402(8) Å                                              | ∠ = 90°.        |
| Volume                 | 3452.56(15) Å <sup>3</sup>                                    |                 |
| Z                      | 8                                                             |                 |
| Density (calculated)   | 1.387 Mg/m <sup>3</sup>                                       |                 |
| Absorption coefficient | 0.791 mm <sup>-1</sup>                                        |                 |
| F(000)                 | 1504                                                          |                 |
| Crystal size           | 0.12 x 0.10 x 0.10 mm <sup>3</sup>                            |                 |

|                                   |                                             |
|-----------------------------------|---------------------------------------------|
| Theta range for data collection   | 3.22 to 65.78°.                             |
| Index ranges                      | -15<=h<=16, -3<=k<=8, -40<=l<=40            |
| Reflections collected             | 18171                                       |
| Independent reflections           | 5703 [R(int) = 0.0460]                      |
| Completeness to theta = 65.78°    | 95.2 %                                      |
| Absorption correction             | Semi-empirical from equivalents             |
| Max. and min. transmission        | 0.9492 and 0.8180                           |
| Refinement method                 | Full-matrix least-squares on F <sup>2</sup> |
| Data / restraints / parameters    | 5703 / 111 / 526                            |
| Goodness-of-fit on F <sup>2</sup> | 1.039                                       |
| Final R indices [I>2sigma(I)]     | R1 = 0.0586, wR2 = 0.1431                   |
| R indices (all data)              | R1 = 0.0978, wR2 = 0.1682                   |
| Largest diff. peak and hole       | 0.309 and -0.235 e.Å <sup>-3</sup>          |

Table 2. Atomic coordinates ( $\times 10^4$ ) and equivalent isotropic displacement parameters ( $\text{\AA}^2 \times 10^3$ ) for 130527.  $U(\text{eq})$  is defined as one third of the trace of the orthogonalized  $U^{ij}$  tensor.

|       | x        | y       | z       | U(eq)  |
|-------|----------|---------|---------|--------|
| C(1)  | 9412(2)  | 3209(5) | 731(1)  | 52(1)  |
| C(2)  | 8917(2)  | 3084(5) | 336(1)  | 54(1)  |
| C(3)  | 9112(3)  | 2877(6) | -48(1)  | 68(1)  |
| C(4)  | 7510(2)  | 2956(5) | -281(1) | 64(1)  |
| C(5)  | 7950(2)  | 3225(4) | 369(1)  | 52(1)  |
| C(6)  | 6810(3)  | 2821(7) | -652(1) | 90(1)  |
| C(7)  | 5249(3)  | 2246(9) | -885(1) | 109(2) |
| C(8)  | 10439(2) | 3146(5) | 879(1)  | 57(1)  |
| C(9)  | 10805(2) | 3923(5) | 1242(1) | 63(1)  |
| C(10) | 11766(3) | 3888(6) | 1381(1) | 72(1)  |
| C(11) | 12386(3) | 3088(6) | 1161(1) | 78(1)  |
| C(12) | 12038(3) | 2302(7) | 800(1)  | 84(1)  |
| C(13) | 11068(2) | 2328(6) | 657(1)  | 73(1)  |
| C(14) | 7088(2)  | 3568(5) | 962(1)  | 50(1)  |
| C(15) | 6218(2)  | 2822(5) | 799(1)  | 63(1)  |
| C(16) | 5459(2)  | 2919(5) | 1005(1) | 63(1)  |
| C(17) | 5563(2)  | 3757(5) | 1373(1) | 56(1)  |
| C(18) | 6427(2)  | 4506(5) | 1536(1) | 56(1)  |
| C(19) | 7186(2)  | 4404(5) | 1328(1) | 54(1)  |
| C(20) | 4806(3)  | 4587(7) | 1926(1) | 86(1)  |
| C(21) | 10094(2) | 8433(4) | 1688(1) | 51(1)  |
| C(22) | 9619(2)  | 8440(4) | 1288(1) | 51(1)  |
| C(23) | 9845(2)  | 8232(5) | 909(1)  | 61(1)  |
| C(24) | 8252(2)  | 8375(5) | 660(1)  | 56(1)  |
| C(25) | 8654(2)  | 8589(4) | 1314(1) | 49(1)  |
| C(28) | 11113(2) | 8291(5) | 1846(1) | 55(1)  |
| C(29) | 11412(2) | 7508(5) | 2215(1) | 62(1)  |
| C(30) | 12375(3) | 7383(6) | 2363(1) | 73(1)  |
| C(31) | 13036(3) | 8015(6) | 2141(1) | 80(1)  |
| C(32) | 12748(3) | 8777(7) | 1773(1) | 83(1)  |
| C(33) | 11789(2) | 8919(6) | 1626(1) | 69(1)  |
| C(34) | 7750(2)  | 8738(4) | 1896(1) | 46(1)  |
| C(35) | 6909(2)  | 9534(5) | 1715(1) | 53(1)  |

|        |          |          |          |        |
|--------|----------|----------|----------|--------|
| C(36)  | 6136(2)  | 9600(5)  | 1914(1)  | 53(1)  |
| C(37)  | 6206(2)  | 8886(4)  | 2295(1)  | 50(1)  |
| C(38)  | 7041(2)  | 8084(5)  | 2472(1)  | 54(1)  |
| C(39)  | 7814(2)  | 8005(4)  | 2274(1)  | 52(1)  |
| C(40)  | 5413(3)  | 8379(7)  | 2854(1)  | 82(1)  |
| N(1)   | 7895(2)  | 3429(4)  | 762(1)   | 51(1)  |
| N(2)   | 8794(2)  | 3423(4)  | 981(1)   | 57(1)  |
| N(3)   | 8417(2)  | 2799(5)  | -354(1)  | 75(1)  |
| N(4)   | 7222(2)  | 3189(4)  | 66(1)    | 57(1)  |
| N(5)   | 8570(2)  | 8666(4)  | 1703(1)  | 51(1)  |
| N(6)   | 9459(2)  | 8557(4)  | 1933(1)  | 54(1)  |
| N(7)   | 9163(2)  | 8197(4)  | 594(1)   | 63(1)  |
| N(8)   | 7939(2)  | 8580(4)  | 1004(1)  | 54(1)  |
| O(1)   | 5856(2)  | 2883(4)  | -588(1)  | 82(1)  |
| O(2)   | 5442(3)  | 1660(7)  | -1180(1) | 138(2) |
| O(3)   | 4762(2)  | 3738(4)  | 1552(1)  | 75(1)  |
| O(6)   | 5395(2)  | 9068(4)  | 2465(1)  | 65(1)  |
| O(4)   | 6612(5)  | 8303(18) | 360(2)   | 82(2)  |
| O(5)   | 6063(13) | 8768(19) | -266(4)  | 89(3)  |
| C(26)  | 7538(11) | 8210(50) | 274(8)   | 73(3)  |
| C(27)  | 5920(8)  | 8500(20) | 42(3)    | 85(2)  |
| O(4')  | 6769(5)  | 7279(13) | 335(2)   | 88(2)  |
| O(5')  | 6014(13) | 8050(20) | -238(3)  | 123(4) |
| C(26') | 7552(10) | 8410(40) | 299(7)   | 69(2)  |
| C(27') | 6046(7)  | 7306(19) | 46(3)    | 91(2)  |

---

Table 3. Bond lengths [ $\text{\AA}$ ] and angles [ $^\circ$ ] for 130527.

---

|             |          |
|-------------|----------|
| C(1)-N(2)   | 1.325(4) |
| C(1)-C(2)   | 1.423(4) |
| C(1)-C(8)   | 1.468(4) |
| C(2)-C(3)   | 1.389(4) |
| C(2)-C(5)   | 1.398(4) |
| C(3)-N(3)   | 1.322(4) |
| C(3)-H(3)   | 0.9500   |
| C(4)-N(4)   | 1.323(4) |
| C(4)-N(3)   | 1.354(4) |
| C(4)-C(6)   | 1.487(5) |
| C(5)-N(4)   | 1.344(4) |
| C(5)-N(1)   | 1.363(4) |
| C(6)-O(1)   | 1.406(4) |
| C(6)-H(6A)  | 0.9900   |
| C(6)-H(6B)  | 0.9900   |
| C(7)-O(2)   | 1.165(5) |
| C(7)-O(1)   | 1.309(5) |
| C(7)-H(7)   | 0.9500   |
| C(8)-C(9)   | 1.388(4) |
| C(8)-C(13)  | 1.388(4) |
| C(9)-C(10)  | 1.373(5) |
| C(9)-H(9)   | 0.9500   |
| C(10)-C(11) | 1.369(5) |
| C(10)-H(10) | 0.9500   |
| C(11)-C(12) | 1.376(5) |
| C(11)-H(11) | 0.9500   |
| C(12)-C(13) | 1.387(5) |
| C(12)-H(12) | 0.9500   |
| C(13)-H(13) | 0.9500   |
| C(14)-C(19) | 1.374(4) |
| C(14)-C(15) | 1.384(4) |
| C(14)-N(1)  | 1.425(4) |
| C(15)-C(16) | 1.377(4) |
| C(15)-H(15) | 0.9500   |
| C(16)-C(17) | 1.383(4) |
| C(16)-H(16) | 0.9500   |

|              |          |
|--------------|----------|
| C(17)-O(3)   | 1.371(4) |
| C(17)-C(18)  | 1.376(4) |
| C(18)-C(19)  | 1.381(4) |
| C(18)-H(18)  | 0.9500   |
| C(19)-H(19)  | 0.9500   |
| C(20)-O(3)   | 1.406(4) |
| C(20)-H(20A) | 0.9800   |
| C(20)-H(20B) | 0.9800   |
| C(20)-H(20C) | 0.9800   |
| C(21)-N(6)   | 1.323(4) |
| C(21)-C(22)  | 1.429(4) |
| C(21)-C(28)  | 1.467(4) |
| C(22)-C(23)  | 1.387(4) |
| C(22)-C(25)  | 1.390(4) |
| C(23)-N(7)   | 1.330(4) |
| C(23)-H(23)  | 0.9500   |
| C(24)-N(8)   | 1.326(4) |
| C(24)-N(7)   | 1.352(4) |
| C(24)-C(26') | 1.46(2)  |
| C(24)-C(26)  | 1.54(3)  |
| C(25)-N(8)   | 1.348(4) |
| C(25)-N(5)   | 1.354(3) |
| C(28)-C(33)  | 1.384(4) |
| C(28)-C(29)  | 1.385(4) |
| C(29)-C(30)  | 1.385(5) |
| C(29)-H(29)  | 0.9500   |
| C(30)-C(31)  | 1.371(5) |
| C(30)-H(30)  | 0.9500   |
| C(31)-C(32)  | 1.376(6) |
| C(31)-H(31)  | 0.9500   |
| C(32)-C(33)  | 1.380(5) |
| C(32)-H(32)  | 0.9500   |
| C(33)-H(33)  | 0.9500   |
| C(34)-C(35)  | 1.382(4) |
| C(34)-C(39)  | 1.385(4) |
| C(34)-N(5)   | 1.424(4) |
| C(35)-C(36)  | 1.379(4) |
| C(35)-H(35)  | 0.9500   |



|                |           |
|----------------|-----------|
| C(36)-C(37)    | 1.388(4)  |
| C(36)-H(36)    | 0.9500    |
| C(37)-O(6)     | 1.372(3)  |
| C(37)-C(38)    | 1.373(4)  |
| C(38)-C(39)    | 1.376(4)  |
| C(38)-H(38)    | 0.9500    |
| C(39)-H(39)    | 0.9500    |
| C(40)-O(6)     | 1.413(4)  |
| C(40)-H(40A)   | 0.9800    |
| C(40)-H(40B)   | 0.9800    |
| C(40)-H(40C)   | 0.9800    |
| N(1)-N(2)      | 1.376(3)  |
| N(5)-N(6)      | 1.381(3)  |
| O(4)-C(27)     | 1.353(10) |
| O(4)-C(26)     | 1.394(15) |
| O(5)-C(27)     | 1.117(12) |
| C(26)-H(26A)   | 0.9900    |
| C(26)-H(26B)   | 0.9900    |
| C(27)-H(27)    | 0.9500    |
| O(4')-C(27')   | 1.310(8)  |
| O(4')-C(26')   | 1.399(13) |
| O(5')-C(27')   | 1.102(10) |
| C(26')-H(26C)  | 0.9900    |
| C(26')-H(26D)  | 0.9900    |
| C(27')-H(27')  | 0.9500    |
|                |           |
| N(2)-C(1)-C(2) | 109.9(3)  |
| N(2)-C(1)-C(8) | 120.2(3)  |
| C(2)-C(1)-C(8) | 130.0(3)  |
| C(3)-C(2)-C(5) | 115.2(3)  |
| C(3)-C(2)-C(1) | 139.4(3)  |
| C(5)-C(2)-C(1) | 105.4(3)  |
| N(3)-C(3)-C(2) | 121.1(3)  |
| N(3)-C(3)-H(3) | 119.4     |
| C(2)-C(3)-H(3) | 119.4     |
| N(4)-C(4)-N(3) | 127.5(3)  |
| N(4)-C(4)-C(6) | 120.9(3)  |
| N(3)-C(4)-C(6) | 111.5(3)  |

|                   |          |
|-------------------|----------|
| N(4)-C(5)-N(1)    | 127.2(3) |
| N(4)-C(5)-C(2)    | 125.7(3) |
| N(1)-C(5)-C(2)    | 107.1(3) |
| O(1)-C(6)-C(4)    | 113.4(3) |
| O(1)-C(6)-H(6A)   | 108.9    |
| C(4)-C(6)-H(6A)   | 108.9    |
| O(1)-C(6)-H(6B)   | 108.9    |
| C(4)-C(6)-H(6B)   | 108.9    |
| H(6A)-C(6)-H(6B)  | 107.7    |
| O(2)-C(7)-O(1)    | 125.8(5) |
| O(2)-C(7)-H(7)    | 117.1    |
| O(1)-C(7)-H(7)    | 117.1    |
| C(9)-C(8)-C(13)   | 118.4(3) |
| C(9)-C(8)-C(1)    | 120.7(3) |
| C(13)-C(8)-C(1)   | 120.9(3) |
| C(10)-C(9)-C(8)   | 121.0(3) |
| C(10)-C(9)-H(9)   | 119.5    |
| C(8)-C(9)-H(9)    | 119.5    |
| C(11)-C(10)-C(9)  | 120.5(3) |
| C(11)-C(10)-H(10) | 119.8    |
| C(9)-C(10)-H(10)  | 119.8    |
| C(10)-C(11)-C(12) | 119.5(3) |
| C(10)-C(11)-H(11) | 120.3    |
| C(12)-C(11)-H(11) | 120.3    |
| C(11)-C(12)-C(13) | 120.6(4) |
| C(11)-C(12)-H(12) | 119.7    |
| C(13)-C(12)-H(12) | 119.7    |
| C(12)-C(13)-C(8)  | 120.0(3) |
| C(12)-C(13)-H(13) | 120.0    |
| C(8)-C(13)-H(13)  | 120.0    |
| C(19)-C(14)-C(15) | 119.7(3) |
| C(19)-C(14)-N(1)  | 119.5(3) |
| C(15)-C(14)-N(1)  | 120.8(3) |
| C(16)-C(15)-C(14) | 119.6(3) |
| C(16)-C(15)-H(15) | 120.2    |
| C(14)-C(15)-H(15) | 120.2    |
| C(15)-C(16)-C(17) | 120.4(3) |
| C(15)-C(16)-H(16) | 119.8    |

|                     |          |
|---------------------|----------|
| C(17)-C(16)-H(16)   | 119.8    |
| O(3)-C(17)-C(18)    | 124.9(3) |
| O(3)-C(17)-C(16)    | 115.0(3) |
| C(18)-C(17)-C(16)   | 120.1(3) |
| C(17)-C(18)-C(19)   | 119.3(3) |
| C(17)-C(18)-H(18)   | 120.4    |
| C(19)-C(18)-H(18)   | 120.4    |
| C(14)-C(19)-C(18)   | 120.9(3) |
| C(14)-C(19)-H(19)   | 119.6    |
| C(18)-C(19)-H(19)   | 119.6    |
| O(3)-C(20)-H(20A)   | 109.5    |
| O(3)-C(20)-H(20B)   | 109.5    |
| H(20A)-C(20)-H(20B) | 109.5    |
| O(3)-C(20)-H(20C)   | 109.5    |
| H(20A)-C(20)-H(20C) | 109.5    |
| H(20B)-C(20)-H(20C) | 109.5    |
| N(6)-C(21)-C(22)    | 109.6(3) |
| N(6)-C(21)-C(28)    | 120.2(3) |
| C(22)-C(21)-C(28)   | 130.2(3) |
| C(23)-C(22)-C(25)   | 116.1(3) |
| C(23)-C(22)-C(21)   | 138.5(3) |
| C(25)-C(22)-C(21)   | 105.3(3) |
| N(7)-C(23)-C(22)    | 120.7(3) |
| N(7)-C(23)-H(23)    | 119.6    |
| C(22)-C(23)-H(23)   | 119.6    |
| N(8)-C(24)-N(7)     | 128.1(3) |
| N(8)-C(24)-C(26')   | 117.9(7) |
| N(7)-C(24)-C(26')   | 114.0(7) |
| N(8)-C(24)-C(26)    | 120.0(8) |
| N(7)-C(24)-C(26)    | 111.8(8) |
| C(26')-C(24)-C(26)  | 6(2)     |
| N(8)-C(25)-N(5)     | 127.0(3) |
| N(8)-C(25)-C(22)    | 125.4(3) |
| N(5)-C(25)-C(22)    | 107.6(2) |
| C(33)-C(28)-C(29)   | 119.2(3) |
| C(33)-C(28)-C(21)   | 120.2(3) |
| C(29)-C(28)-C(21)   | 120.6(3) |
| C(28)-C(29)-C(30)   | 120.2(3) |

|                     |          |
|---------------------|----------|
| C(28)-C(29)-H(29)   | 119.9    |
| C(30)-C(29)-H(29)   | 119.9    |
| C(31)-C(30)-C(29)   | 119.9(4) |
| C(31)-C(30)-H(30)   | 120.0    |
| C(29)-C(30)-H(30)   | 120.0    |
| C(30)-C(31)-C(32)   | 120.4(3) |
| C(30)-C(31)-H(31)   | 119.8    |
| C(32)-C(31)-H(31)   | 119.8    |
| C(31)-C(32)-C(33)   | 119.9(4) |
| C(31)-C(32)-H(32)   | 120.0    |
| C(33)-C(32)-H(32)   | 120.0    |
| C(32)-C(33)-C(28)   | 120.4(4) |
| C(32)-C(33)-H(33)   | 119.8    |
| C(28)-C(33)-H(33)   | 119.8    |
| C(35)-C(34)-C(39)   | 120.2(3) |
| C(35)-C(34)-N(5)    | 121.2(3) |
| C(39)-C(34)-N(5)    | 118.5(2) |
| C(36)-C(35)-C(34)   | 119.4(3) |
| C(36)-C(35)-H(35)   | 120.3    |
| C(34)-C(35)-H(35)   | 120.3    |
| C(35)-C(36)-C(37)   | 120.2(3) |
| C(35)-C(36)-H(36)   | 119.9    |
| C(37)-C(36)-H(36)   | 119.9    |
| O(6)-C(37)-C(38)    | 125.3(3) |
| O(6)-C(37)-C(36)    | 114.7(3) |
| C(38)-C(37)-C(36)   | 120.1(3) |
| C(37)-C(38)-C(39)   | 120.0(3) |
| C(37)-C(38)-H(38)   | 120.0    |
| C(39)-C(38)-H(38)   | 120.0    |
| C(38)-C(39)-C(34)   | 120.0(3) |
| C(38)-C(39)-H(39)   | 120.0    |
| C(34)-C(39)-H(39)   | 120.0    |
| O(6)-C(40)-H(40A)   | 109.5    |
| O(6)-C(40)-H(40B)   | 109.5    |
| H(40A)-C(40)-H(40B) | 109.5    |
| O(6)-C(40)-H(40C)   | 109.5    |
| H(40A)-C(40)-H(40C) | 109.5    |
| H(40B)-C(40)-H(40C) | 109.5    |

|                      |           |
|----------------------|-----------|
| C(5)-N(1)-N(2)       | 110.2(2)  |
| C(5)-N(1)-C(14)      | 130.8(2)  |
| N(2)-N(1)-C(14)      | 119.0(2)  |
| C(1)-N(2)-N(1)       | 107.5(2)  |
| C(3)-N(3)-C(4)       | 117.8(3)  |
| C(4)-N(4)-C(5)       | 112.6(3)  |
| C(25)-N(5)-N(6)      | 110.1(2)  |
| C(25)-N(5)-C(34)     | 131.2(2)  |
| N(6)-N(5)-C(34)      | 118.6(2)  |
| C(21)-N(6)-N(5)      | 107.3(2)  |
| C(23)-N(7)-C(24)     | 117.4(3)  |
| C(24)-N(8)-C(25)     | 112.4(3)  |
| C(7)-O(1)-C(6)       | 113.7(3)  |
| C(17)-O(3)-C(20)     | 118.4(3)  |
| C(37)-O(6)-C(40)     | 117.9(2)  |
| C(27)-O(4)-C(26)     | 115.2(13) |
| O(4)-C(26)-C(24)     | 109.4(18) |
| O(4)-C(26)-H(26A)    | 109.8     |
| C(24)-C(26)-H(26A)   | 109.8     |
| O(4)-C(26)-H(26B)    | 109.8     |
| C(24)-C(26)-H(26B)   | 109.8     |
| H(26A)-C(26)-H(26B)  | 108.2     |
| O(5)-C(27)-O(4)      | 123.9(13) |
| O(5)-C(27)-H(27)     | 118.0     |
| O(4)-C(27)-H(27)     | 118.0     |
| C(27')-O(4')-C(26')  | 117.7(11) |
| O(4')-C(26')-C(24)   | 111.2(15) |
| O(4')-C(26')-H(26C)  | 109.4     |
| C(24)-C(26')-H(26C)  | 109.4     |
| O(4')-C(26')-H(26D)  | 109.4     |
| C(24)-C(26')-H(26D)  | 109.4     |
| H(26C)-C(26')-H(26D) | 108.0     |
| O(5')-C(27')-O(4')   | 126.3(11) |
| O(5')-C(27')-H(27')  | 116.8     |
| O(4')-C(27')-H(27')  | 116.8     |

---

Symmetry transformations used to generate equivalent atoms:

Table 4. Anisotropic displacement parameters ( $\text{\AA}^2 \times 10^3$ ) for 130527. The anisotropic displacement factor exponent takes the form:  $-2\pi^2 [h^2 a^{*2} U^{11} + \dots + 2 h k a^* b^* U^{12}]$

|       | U <sup>11</sup> | U <sup>22</sup> | U <sup>33</sup> | U <sup>23</sup> | U <sup>13</sup> | U <sup>12</sup> |
|-------|-----------------|-----------------|-----------------|-----------------|-----------------|-----------------|
| C(1)  | 48(2)           | 65(2)           | 45(2)           | -5(1)           | 12(1)           | -3(1)           |
| C(2)  | 49(2)           | 69(2)           | 44(2)           | -9(1)           | 10(1)           | -4(2)           |
| C(3)  | 58(2)           | 99(3)           | 51(2)           | -7(2)           | 16(2)           | -6(2)           |
| C(4)  | 62(2)           | 87(3)           | 42(2)           | -3(2)           | 8(2)            | -10(2)          |
| C(5)  | 52(2)           | 61(2)           | 44(2)           | -4(1)           | 8(1)            | -2(1)           |
| C(6)  | 67(3)           | 155(4)          | 46(2)           | -5(2)           | 5(2)            | -17(3)          |
| C(7)  | 72(3)           | 191(6)          | 62(3)           | -5(3)           | 3(2)            | -22(3)          |
| C(8)  | 48(2)           | 75(2)           | 48(2)           | -4(2)           | 10(1)           | -3(2)           |
| C(9)  | 54(2)           | 77(2)           | 57(2)           | -8(2)           | 5(2)            | 3(2)            |
| C(10) | 60(2)           | 92(3)           | 62(2)           | -10(2)          | 0(2)            | -7(2)           |
| C(11) | 50(2)           | 109(3)          | 74(3)           | 1(2)            | 2(2)            | -5(2)           |
| C(12) | 53(2)           | 130(4)          | 71(3)           | -7(2)           | 18(2)           | 8(2)            |
| C(13) | 52(2)           | 113(3)          | 53(2)           | -14(2)          | 10(2)           | 2(2)            |
| C(14) | 43(2)           | 67(2)           | 40(2)           | -1(1)           | 7(1)            | 1(1)            |
| C(15) | 48(2)           | 94(3)           | 44(2)           | -14(2)          | 2(2)            | -4(2)           |
| C(16) | 41(2)           | 93(3)           | 54(2)           | -11(2)          | 2(2)            | -8(2)           |
| C(17) | 44(2)           | 77(2)           | 46(2)           | -1(2)           | 6(1)            | 5(2)            |
| C(18) | 49(2)           | 74(2)           | 45(2)           | -11(2)          | 7(1)            | -3(2)           |
| C(19) | 47(2)           | 68(2)           | 45(2)           | -8(1)           | 5(1)            | -7(2)           |
| C(20) | 70(3)           | 126(4)          | 67(2)           | -20(2)          | 26(2)           | 3(2)            |
| C(21) | 48(2)           | 60(2)           | 46(2)           | -4(1)           | 6(1)            | 2(1)            |
| C(22) | 48(2)           | 60(2)           | 45(2)           | -3(1)           | 6(1)            | 0(1)            |
| C(23) | 52(2)           | 81(2)           | 51(2)           | -4(2)           | 13(2)           | 2(2)            |
| C(24) | 54(2)           | 73(2)           | 41(2)           | -1(1)           | 8(2)            | -3(2)           |
| C(25) | 48(2)           | 58(2)           | 40(2)           | -2(1)           | 4(1)            | 0(1)            |
| C(28) | 44(2)           | 71(2)           | 50(2)           | -8(2)           | 5(1)            | 2(2)            |
| C(29) | 52(2)           | 78(2)           | 55(2)           | -4(2)           | 2(2)            | 2(2)            |
| C(30) | 60(2)           | 85(3)           | 69(2)           | -6(2)           | -6(2)           | 5(2)            |
| C(31) | 49(2)           | 105(3)          | 82(3)           | -24(2)          | -4(2)           | 7(2)            |
| C(32) | 51(2)           | 117(4)          | 86(3)           | -18(2)          | 22(2)           | -10(2)          |
| C(33) | 51(2)           | 94(3)           | 62(2)           | -4(2)           | 9(2)            | -8(2)           |
| C(34) | 40(2)           | 61(2)           | 37(2)           | -4(1)           | 4(1)            | 0(1)            |
| C(35) | 48(2)           | 71(2)           | 39(2)           | 1(1)            | 3(1)            | 4(2)            |

|        |        |         |       |        |        |        |
|--------|--------|---------|-------|--------|--------|--------|
| C(36)  | 44(2)  | 71(2)   | 41(2) | -2(1)  | 0(1)   | 4(1)   |
| C(37)  | 45(2)  | 65(2)   | 41(2) | -7(1)  | 8(1)   | -4(1)  |
| C(38)  | 53(2)  | 70(2)   | 39(2) | 6(1)   | 5(1)   | 3(2)   |
| C(39)  | 48(2)  | 63(2)   | 44(2) | 3(1)   | 3(1)   | 5(1)   |
| C(40)  | 73(3)  | 123(4)  | 54(2) | 11(2)  | 24(2)  | 6(2)   |
| N(1)   | 42(1)  | 74(2)   | 38(1) | -4(1)  | 6(1)   | -3(1)  |
| N(2)   | 47(2)  | 78(2)   | 44(1) | -6(1)  | 7(1)   | 0(1)   |
| N(3)   | 62(2)  | 122(3)  | 43(2) | -9(2)  | 10(1)  | -7(2)  |
| N(4)   | 56(2)  | 76(2)   | 39(1) | -4(1)  | 4(1)   | -7(1)  |
| N(5)   | 43(1)  | 70(2)   | 37(1) | -3(1)  | 2(1)   | 4(1)   |
| N(6)   | 44(1)  | 71(2)   | 43(1) | -3(1)  | 1(1)   | 2(1)   |
| N(7)   | 61(2)  | 87(2)   | 42(2) | -5(1)  | 9(1)   | -1(2)  |
| N(8)   | 51(2)  | 72(2)   | 38(1) | 0(1)   | 3(1)   | -1(1)  |
| O(1)   | 65(2)  | 127(2)  | 49(1) | -5(1)  | -1(1)  | 4(2)   |
| O(2)   | 113(3) | 216(4)  | 82(2) | -47(3) | 10(2)  | -50(3) |
| O(3)   | 47(1)  | 117(2)  | 64(2) | -18(1) | 17(1)  | -4(1)  |
| O(6)   | 52(1)  | 96(2)   | 50(1) | 3(1)   | 14(1)  | 5(1)   |
| O(4)   | 63(3)  | 137(5)  | 45(3) | -2(4)  | 4(2)   | 3(4)   |
| O(5)   | 86(5)  | 102(8)  | 70(4) | 17(4)  | -18(4) | -9(6)  |
| C(26)  | 64(4)  | 110(6)  | 46(5) | 7(5)   | 9(4)   | -2(4)  |
| C(27)  | 71(4)  | 125(6)  | 54(4) | -1(5)  | -6(4)  | -6(5)  |
| O(4')  | 83(3)  | 99(4)   | 71(3) | 9(3)   | -19(3) | -23(3) |
| O(5')  | 118(6) | 162(10) | 75(5) | 14(5)  | -32(4) | -41(8) |
| C(26') | 64(4)  | 100(5)  | 39(4) | -4(4)  | -1(3)  | -18(4) |
| C(27') | 79(4)  | 126(6)  | 61(4) | 3(5)   | -14(3) | -24(4) |

---

Table 5. Hydrogen coordinates ( $\times 10^4$ ) and isotropic displacement parameters ( $\text{\AA}^2 \times 10^{-3}$ ) for 130527.

|        | x     | y     | z    | U(eq) |
|--------|-------|-------|------|-------|
| H(3)   | 9756  | 2789  | -91  | 82    |
| H(6A)  | 6923  | 3853  | -830 | 108   |
| H(6B)  | 6918  | 1645  | -788 | 108   |
| H(7)   | 4593  | 2264  | -857 | 131   |
| H(9)   | 10384 | 4487  | 1398 | 75    |
| H(10)  | 12003 | 4423  | 1631 | 87    |
| H(11)  | 13051 | 3076  | 1257 | 94    |
| H(12)  | 12465 | 1737  | 648  | 101   |
| H(13)  | 10835 | 1785  | 408  | 87    |
| H(15)  | 6144  | 2247  | 545  | 75    |
| H(16)  | 4860  | 2407  | 894  | 76    |
| H(18)  | 6500  | 5088  | 1789 | 67    |
| H(19)  | 7784  | 4918  | 1440 | 64    |
| H(20A) | 5276  | 3943  | 2119 | 129   |
| H(20B) | 4178  | 4521  | 2011 | 129   |
| H(20C) | 4993  | 5888  | 1907 | 129   |
| H(23)  | 10493 | 8113  | 874  | 73    |
| H(29)  | 10954 | 7056  | 2367 | 75    |
| H(30)  | 12578 | 6859  | 2617 | 88    |
| H(31)  | 13697 | 7927  | 2243 | 96    |
| H(32)  | 13209 | 9205  | 1619 | 100   |
| H(33)  | 11591 | 9451  | 1372 | 83    |
| H(35)  | 6864  | 10031 | 1455 | 64    |
| H(36)  | 5554  | 10136 | 1791 | 63    |
| H(38)  | 7086  | 7583  | 2732 | 65    |
| H(39)  | 8392  | 7448  | 2397 | 62    |
| H(40A) | 5559  | 7050  | 2859 | 123   |
| H(40B) | 4789  | 8575  | 2936 | 123   |
| H(40C) | 5904  | 9035  | 3036 | 123   |
| H(26A) | 7645  | 9220  | 90   | 87    |
| H(26B) | 7633  | 7010  | 143  | 87    |
| H(27)  | 5275  | 8400  | 83   | 102   |



|        |      |      |     |     |
|--------|------|------|-----|-----|
| H(26C) | 7332 | 9696 | 242 | 83  |
| H(26D) | 7855 | 7971 | 73  | 83  |
| H(27') | 5496 | 6621 | 85  | 110 |

---

## Notes and references

- 1 W.-N. Su, T.-P. Lin, K.-M. Cheng, K.-C. Sung, S.-K. Lin and F. F. Wong, *J. Heterocyclic Chem.*, 2010, **47**, 831–837.
- 2 F. F. Wong, P.-W. Chang, H.-C. Lin, B.-J. You, J.-J. Huang, S.-K. Lin, *J. Organomet. Chem.* 2009, **694**, 3452–3455.
